# Supplementary material for: Identifying Discriminative Biological Function Features and Rules for Cancer-Related Long Non-coding RNAs
Source: Front Genet. 2020 Dec 16;11:598773. doi: 10.3389/fgene.2020.598773 (PMC7772407; doi:10.3389/fgene.2020.598773)
Supplement: Supplementary Material 3 — Rules generated via DT with the top 970 features in the mRMR feature list. [file Table_3.XLSX]

## Sheet: Supp_S3
Supplementary Material S3. Rules generated via DT with the top 970 features in the mRMR feature list.
Rules_0	passed counts:3947
node_0: feature_name=GO:0006275	feature_id[261].value <= threshold=0.611920565366745
node_1: feature_name=GO:0090162	feature_id[0].value <= threshold=4.428043030202389e-05
node_2: feature_name=GO:0000188	feature_id[37].value <= threshold=0.017420049756765366
node_3: feature_name=GO:0034720	feature_id[532].value <= threshold=0.0011523710563778877
node_4: feature_name=GO:0017182	feature_id[3].value <= threshold=0.0012494438560679555
node_5: feature_name=GO:0000188	feature_id[37].value <= threshold=7.692553481319919e-05
node_6: feature_name=GO:0032976	feature_id[558].value <= threshold=2.501685380935669
node_7: feature_name=GO:0048611	feature_id[174].value <= threshold=2.2866528034210205
node_8: feature_name=GO:0015811	feature_id[96].value <= threshold=2.909415364265442
node_9: feature_name=GO:0072128	feature_id[369].value <= threshold=2.5927542448043823
node_10: feature_name=GO:0034696	feature_id[84].value <= threshold=2.3267431259155273
node_11: feature_name=GO:1902523	feature_id[44].value <= threshold=2.345110058784485
node_12: feature_name=GO:0005720	feature_id[77].value <= threshold=2.4013863801956177
Class: Other lncRNAs
Rules_1	passed counts:1914
node_0: feature_name=GO:0006275	feature_id[261].value > threshold=0.611920565366745
node_462: feature_name=GO:2000642	feature_id[20].value <= threshold=0.6624273061752319
node_463: feature_name=GO:0035105	feature_id[46].value <= threshold=2.0055588483810425
node_464: feature_name=GO:2000299	feature_id[31].value <= threshold=1.0164494514465332
node_465: feature_name=GO:0006275	feature_id[261].value <= threshold=0.6121423840522766
node_466: feature_name=GO:0070011	feature_id[15].value > threshold=1.6098740100860596
node_468: feature_name=GO:0045185	feature_id[785].value > threshold=0.1677512377500534
node_470: feature_name=GO:0008589	feature_id[722].value > threshold=0.5243089497089386
node_472: feature_name=GO:0019972	feature_id[165].value > threshold=0.3506065607070923
Class: Other lncRNAs
Rules_2	passed counts:1787
node_0: feature_name=GO:0006275	feature_id[261].value > threshold=0.611920565366745
node_462: feature_name=GO:2000642	feature_id[20].value <= threshold=0.6624273061752319
node_463: feature_name=GO:0035105	feature_id[46].value <= threshold=2.0055588483810425
node_464: feature_name=GO:2000299	feature_id[31].value <= threshold=1.0164494514465332
node_465: feature_name=GO:0006275	feature_id[261].value > threshold=0.6121423840522766
Class: Other lncRNAs
Rules_3	passed counts:1716
node_0: feature_name=GO:0006275	feature_id[261].value <= threshold=0.611920565366745
node_1: feature_name=GO:0090162	feature_id[0].value <= threshold=4.428043030202389e-05
node_2: feature_name=GO:0000188	feature_id[37].value > threshold=0.017420049756765366
node_68: feature_name=GO:0032026	feature_id[7].value > threshold=0.413987472653389
node_222: feature_name=GO:0050124	feature_id[476].value <= threshold=0.0037437553983181715
node_223: feature_name=GO:0044795	feature_id[915].value <= threshold=0.4820440113544464
node_224: feature_name=GO:0004961	feature_id[259].value <= threshold=0.0033755330368876457
node_225: feature_name=GO:0072697	feature_id[27].value <= threshold=0.0008307198877446353
node_226: feature_name=GO:0030860	feature_id[107].value <= threshold=0.0011463169939815998
node_227: feature_name=GO:0070011	feature_id[15].value > threshold=5.0708380513242446e-05
node_231: feature_name=GO:0090150	feature_id[213].value <= threshold=0.6476474404335022
Class: Other lncRNAs
Rules_4	passed counts:902
node_0: feature_name=GO:0006275	feature_id[261].value <= threshold=0.611920565366745
node_1: feature_name=GO:0090162	feature_id[0].value <= threshold=4.428043030202389e-05
node_2: feature_name=GO:0000188	feature_id[37].value > threshold=0.017420049756765366
node_68: feature_name=GO:0032026	feature_id[7].value <= threshold=0.413987472653389
node_69: feature_name=GO:0009301	feature_id[404].value > threshold=0.23043984174728394
node_209: feature_name=GO:0035253	feature_id[54].value <= threshold=0.7398464977741241
node_210: feature_name=GO:0000023	feature_id[112].value <= threshold=0.041387733072042465
node_211: feature_name=GO:0035253	feature_id[54].value <= threshold=0.7172553837299347
Class: Other lncRNAs
Rules_5	passed counts:455
node_0: feature_name=GO:0006275	feature_id[261].value <= threshold=0.611920565366745
node_1: feature_name=GO:0090162	feature_id[0].value <= threshold=4.428043030202389e-05
node_2: feature_name=GO:0000188	feature_id[37].value > threshold=0.017420049756765366
node_68: feature_name=GO:0032026	feature_id[7].value <= threshold=0.413987472653389
node_69: feature_name=GO:0009301	feature_id[404].value <= threshold=0.23043984174728394
node_70: feature_name=GO:0030511	feature_id[508].value > threshold=0.5425670146942139
node_206: feature_name=GO:0035105	feature_id[46].value <= threshold=0.6627784967422485
Class: Other lncRNAs
Rules_6	passed counts:425
node_0: feature_name=GO:0006275	feature_id[261].value <= threshold=0.611920565366745
node_1: feature_name=GO:0090162	feature_id[0].value > threshold=4.428043030202389e-05
node_253: feature_name=GO:0071617	feature_id[203].value > threshold=0.542830616235733
node_457: feature_name=GO:0010571	feature_id[692].value <= threshold=0.9886640906333923
Class: Other lncRNAs
Rules_7	passed counts:342
node_0: feature_name=GO:0006275	feature_id[261].value <= threshold=0.611920565366745
node_1: feature_name=GO:0090162	feature_id[0].value <= threshold=4.428043030202389e-05
node_2: feature_name=GO:0000188	feature_id[37].value > threshold=0.017420049756765366
node_68: feature_name=GO:0032026	feature_id[7].value <= threshold=0.413987472653389
node_69: feature_name=GO:0009301	feature_id[404].value <= threshold=0.23043984174728394
node_70: feature_name=GO:0030511	feature_id[508].value <= threshold=0.5425670146942139
node_71: feature_name=GO:0051582	feature_id[102].value <= threshold=0.48802419006824493
node_72: feature_name=GO:0002793	feature_id[597].value <= threshold=0.07235005870461464
node_73: feature_name=GO:0035315	feature_id[670].value > threshold=0.19600238651037216
node_93: feature_name=GO:0008444	feature_id[738].value <= threshold=0.03862385079264641
node_94: feature_name=GO:0070652	feature_id[347].value <= threshold=0.693673312664032
Class: Other lncRNAs
Rules_8	passed counts:333
node_0: feature_name=GO:0006275	feature_id[261].value <= threshold=0.611920565366745
node_1: feature_name=GO:0090162	feature_id[0].value <= threshold=4.428043030202389e-05
node_2: feature_name=GO:0000188	feature_id[37].value > threshold=0.017420049756765366
node_68: feature_name=GO:0032026	feature_id[7].value <= threshold=0.413987472653389
node_69: feature_name=GO:0009301	feature_id[404].value <= threshold=0.23043984174728394
node_70: feature_name=GO:0030511	feature_id[508].value <= threshold=0.5425670146942139
node_71: feature_name=GO:0051582	feature_id[102].value > threshold=0.48802419006824493
Class: Other lncRNAs
Rules_9	passed counts:296
node_0: feature_name=GO:0006275	feature_id[261].value <= threshold=0.611920565366745
node_1: feature_name=GO:0090162	feature_id[0].value > threshold=4.428043030202389e-05
node_253: feature_name=GO:0071617	feature_id[203].value <= threshold=0.542830616235733
node_254: feature_name=GO:0048934	feature_id[86].value > threshold=0.6984235048294067
Class: Other lncRNAs
Rules_10	passed counts:203
node_0: feature_name=GO:0006275	feature_id[261].value <= threshold=0.611920565366745
node_1: feature_name=GO:0090162	feature_id[0].value > threshold=4.428043030202389e-05
node_253: feature_name=GO:0071617	feature_id[203].value <= threshold=0.542830616235733
node_254: feature_name=GO:0048934	feature_id[86].value <= threshold=0.6984235048294067
node_255: feature_name=GO:0031492	feature_id[671].value > threshold=0.22999948263168335
Class: Other lncRNAs
Rules_11	passed counts:196
node_0: feature_name=GO:0006275	feature_id[261].value <= threshold=0.611920565366745
node_1: feature_name=GO:0090162	feature_id[0].value > threshold=4.428043030202389e-05
node_253: feature_name=GO:0071617	feature_id[203].value <= threshold=0.542830616235733
node_254: feature_name=GO:0048934	feature_id[86].value <= threshold=0.6984235048294067
node_255: feature_name=GO:0031492	feature_id[671].value <= threshold=0.22999948263168335
node_256: feature_name=GO:2000052	feature_id[602].value > threshold=1.058824062347412
node_452: feature_name=GO:0021740	feature_id[744].value <= threshold=0.939675509929657
Class: Other lncRNAs
Rules_12	passed counts:192
node_0: feature_name=GO:0006275	feature_id[261].value <= threshold=0.611920565366745
node_1: feature_name=GO:0090162	feature_id[0].value <= threshold=4.428043030202389e-05
node_2: feature_name=GO:0000188	feature_id[37].value > threshold=0.017420049756765366
node_68: feature_name=GO:0032026	feature_id[7].value <= threshold=0.413987472653389
node_69: feature_name=GO:0009301	feature_id[404].value <= threshold=0.23043984174728394
node_70: feature_name=GO:0030511	feature_id[508].value <= threshold=0.5425670146942139
node_71: feature_name=GO:0051582	feature_id[102].value <= threshold=0.48802419006824493
node_72: feature_name=GO:0002793	feature_id[597].value <= threshold=0.07235005870461464
node_73: feature_name=GO:0035315	feature_id[670].value <= threshold=0.19600238651037216
node_74: feature_name=GO:0034720	feature_id[532].value <= threshold=0.014872608706355095
node_75: feature_name=GO:0000188	feature_id[37].value > threshold=0.10404785349965096
node_79: feature_name=GO:0016581	feature_id[927].value <= threshold=1.2209702134132385
Class: Other lncRNAs
Rules_13	passed counts:164
node_0: feature_name=GO:0006275	feature_id[261].value <= threshold=0.611920565366745
node_1: feature_name=GO:0090162	feature_id[0].value > threshold=4.428043030202389e-05
node_253: feature_name=GO:0071617	feature_id[203].value <= threshold=0.542830616235733
node_254: feature_name=GO:0048934	feature_id[86].value <= threshold=0.6984235048294067
node_255: feature_name=GO:0031492	feature_id[671].value <= threshold=0.22999948263168335
node_256: feature_name=GO:2000052	feature_id[602].value <= threshold=1.058824062347412
node_257: feature_name=GO:0001697	feature_id[173].value <= threshold=1.4856967329978943
node_258: feature_name=GO:2000323	feature_id[91].value > threshold=0.3833317458629608
node_436: feature_name=GO:0060957	feature_id[402].value <= threshold=0.5145788788795471
Class: Other lncRNAs
Rules_14	passed counts:125
node_0: feature_name=GO:0006275	feature_id[261].value <= threshold=0.611920565366745
node_1: feature_name=GO:0090162	feature_id[0].value <= threshold=4.428043030202389e-05
node_2: feature_name=GO:0000188	feature_id[37].value <= threshold=0.017420049756765366
node_3: feature_name=GO:0034720	feature_id[532].value > threshold=0.0011523710563778877
node_47: feature_name=GO:0090150	feature_id[213].value <= threshold=0.0008717003074707463
node_48: feature_name=GO:0051582	feature_id[102].value <= threshold=0.22194968163967133
Class: Other lncRNAs
Rules_15	passed counts:119
node_0: feature_name=GO:0006275	feature_id[261].value <= threshold=0.611920565366745
node_1: feature_name=GO:0090162	feature_id[0].value > threshold=4.428043030202389e-05
node_253: feature_name=GO:0071617	feature_id[203].value <= threshold=0.542830616235733
node_254: feature_name=GO:0048934	feature_id[86].value <= threshold=0.6984235048294067
node_255: feature_name=GO:0031492	feature_id[671].value <= threshold=0.22999948263168335
node_256: feature_name=GO:2000052	feature_id[602].value <= threshold=1.058824062347412
node_257: feature_name=GO:0001697	feature_id[173].value > threshold=1.4856967329978943
node_441: feature_name=GO:0001697	feature_id[173].value > threshold=1.494957149028778
node_445: feature_name=GO:0002793	feature_id[597].value <= threshold=0.1971605122089386
node_446: feature_name=GO:0051311	feature_id[614].value > threshold=1.4954149723052979
node_448: feature_name=GO:0016895	feature_id[897].value <= threshold=0.23154975473880768
Class: Other lncRNAs
Rules_16	passed counts:117
node_0: feature_name=GO:0006275	feature_id[261].value <= threshold=0.611920565366745
node_1: feature_name=GO:0090162	feature_id[0].value > threshold=4.428043030202389e-05
node_253: feature_name=GO:0071617	feature_id[203].value <= threshold=0.542830616235733
node_254: feature_name=GO:0048934	feature_id[86].value <= threshold=0.6984235048294067
node_255: feature_name=GO:0031492	feature_id[671].value <= threshold=0.22999948263168335
node_256: feature_name=GO:2000052	feature_id[602].value <= threshold=1.058824062347412
node_257: feature_name=GO:0001697	feature_id[173].value <= threshold=1.4856967329978943
node_258: feature_name=GO:2000323	feature_id[91].value <= threshold=0.3833317458629608
node_259: feature_name=GO:0051861	feature_id[280].value <= threshold=0.814757764339447
node_260: feature_name=GO:0090344	feature_id[832].value <= threshold=0.28676562011241913
node_261: feature_name=GO:0003690	feature_id[479].value <= threshold=0.00011137216642964631
node_262: feature_name=GO:0001550	feature_id[100].value <= threshold=0.0034481079783290625
node_263: feature_name=GO:0097382	feature_id[920].value <= threshold=1.1685261726379395
Class: Other lncRNAs
Rules_17	passed counts:98
node_0: feature_name=GO:0006275	feature_id[261].value <= threshold=0.611920565366745
node_1: feature_name=GO:0090162	feature_id[0].value > threshold=4.428043030202389e-05
node_253: feature_name=GO:0071617	feature_id[203].value <= threshold=0.542830616235733
node_254: feature_name=GO:0048934	feature_id[86].value <= threshold=0.6984235048294067
node_255: feature_name=GO:0031492	feature_id[671].value <= threshold=0.22999948263168335
node_256: feature_name=GO:2000052	feature_id[602].value <= threshold=1.058824062347412
node_257: feature_name=GO:0001697	feature_id[173].value <= threshold=1.4856967329978943
node_258: feature_name=GO:2000323	feature_id[91].value <= threshold=0.3833317458629608
node_259: feature_name=GO:0051861	feature_id[280].value > threshold=0.814757764339447
Class: Other lncRNAs
Rules_18	passed counts:96
node_0: feature_name=GO:0006275	feature_id[261].value <= threshold=0.611920565366745
node_1: feature_name=GO:0090162	feature_id[0].value <= threshold=4.428043030202389e-05
node_2: feature_name=GO:0000188	feature_id[37].value > threshold=0.017420049756765366
node_68: feature_name=GO:0032026	feature_id[7].value <= threshold=0.413987472653389
node_69: feature_name=GO:0009301	feature_id[404].value <= threshold=0.23043984174728394
node_70: feature_name=GO:0030511	feature_id[508].value <= threshold=0.5425670146942139
node_71: feature_name=GO:0051582	feature_id[102].value <= threshold=0.48802419006824493
node_72: feature_name=GO:0002793	feature_id[597].value > threshold=0.07235005870461464
node_102: feature_name=GO:0005845	feature_id[540].value > threshold=0.25623150169849396
Class: Other lncRNAs
Rules_19	passed counts:69
node_0: feature_name=GO:0006275	feature_id[261].value <= threshold=0.611920565366745
node_1: feature_name=GO:0090162	feature_id[0].value > threshold=4.428043030202389e-05
node_253: feature_name=GO:0071617	feature_id[203].value <= threshold=0.542830616235733
node_254: feature_name=GO:0048934	feature_id[86].value <= threshold=0.6984235048294067
node_255: feature_name=GO:0031492	feature_id[671].value <= threshold=0.22999948263168335
node_256: feature_name=GO:2000052	feature_id[602].value <= threshold=1.058824062347412
node_257: feature_name=GO:0001697	feature_id[173].value <= threshold=1.4856967329978943
node_258: feature_name=GO:2000323	feature_id[91].value <= threshold=0.3833317458629608
node_259: feature_name=GO:0051861	feature_id[280].value <= threshold=0.814757764339447
node_260: feature_name=GO:0090344	feature_id[832].value <= threshold=0.28676562011241913
node_261: feature_name=GO:0003690	feature_id[479].value > threshold=0.00011137216642964631
node_267: feature_name=GO:0016895	feature_id[897].value <= threshold=0.48792417347431183
node_268: feature_name=GO:0050901	feature_id[175].value <= threshold=1.6129865050315857
node_269: feature_name=GO:0021903	feature_id[211].value <= threshold=0.9824570417404175
node_270: feature_name=GO:0051534	feature_id[945].value <= threshold=0.5949008762836456
node_271: feature_name=GO:1900006	feature_id[697].value <= threshold=0.3523732125759125
node_272: feature_name=GO:0016755	feature_id[874].value <= threshold=0.9256992340087891
node_273: feature_name=GO:0031308	feature_id[875].value <= threshold=1.1520193219184875
node_274: feature_name=GO:0006971	feature_id[358].value <= threshold=1.1031953692436218
node_275: feature_name=GO:0008589	feature_id[722].value <= threshold=3.153539538383484
node_276: feature_name=GO:0016406	feature_id[70].value <= threshold=1.0396768450737
node_277: feature_name=GO:0045263	feature_id[339].value <= threshold=5.477336168289185
node_278: feature_name=GO:0090162	feature_id[0].value <= threshold=1.5517151951789856
node_279: feature_name=GO:0010760	feature_id[718].value <= threshold=1.2278234958648682
node_280: feature_name=GO:0035315	feature_id[670].value > threshold=2.1861218214035034
node_404: feature_name=GO:0090150	feature_id[213].value <= threshold=0.020677789114415646
Class: Other lncRNAs
Rules_20	passed counts:69
node_0: feature_name=GO:0006275	feature_id[261].value <= threshold=0.611920565366745
node_1: feature_name=GO:0090162	feature_id[0].value <= threshold=4.428043030202389e-05
node_2: feature_name=GO:0000188	feature_id[37].value > threshold=0.017420049756765366
node_68: feature_name=GO:0032026	feature_id[7].value <= threshold=0.413987472653389
node_69: feature_name=GO:0009301	feature_id[404].value <= threshold=0.23043984174728394
node_70: feature_name=GO:0030511	feature_id[508].value <= threshold=0.5425670146942139
node_71: feature_name=GO:0051582	feature_id[102].value <= threshold=0.48802419006824493
node_72: feature_name=GO:0002793	feature_id[597].value > threshold=0.07235005870461464
node_102: feature_name=GO:0005845	feature_id[540].value <= threshold=0.25623150169849396
node_103: feature_name=GO:0030202	feature_id[643].value > threshold=0.23878131806850433
Class: Other lncRNAs
Rules_21	passed counts:68
node_0: feature_name=GO:0006275	feature_id[261].value <= threshold=0.611920565366745
node_1: feature_name=GO:0090162	feature_id[0].value <= threshold=4.428043030202389e-05
node_2: feature_name=GO:0000188	feature_id[37].value > threshold=0.017420049756765366
node_68: feature_name=GO:0032026	feature_id[7].value <= threshold=0.413987472653389
node_69: feature_name=GO:0009301	feature_id[404].value <= threshold=0.23043984174728394
node_70: feature_name=GO:0030511	feature_id[508].value <= threshold=0.5425670146942139
node_71: feature_name=GO:0051582	feature_id[102].value <= threshold=0.48802419006824493
node_72: feature_name=GO:0002793	feature_id[597].value > threshold=0.07235005870461464
node_102: feature_name=GO:0005845	feature_id[540].value <= threshold=0.25623150169849396
node_103: feature_name=GO:0030202	feature_id[643].value <= threshold=0.23878131806850433
node_104: feature_name=GO:0051861	feature_id[280].value <= threshold=0.5233777463436127
node_105: feature_name=GO:0035335	feature_id[218].value <= threshold=0.7517804801464081
node_106: feature_name=GO:0043006	feature_id[813].value <= threshold=0.752539187669754
node_107: feature_name=GO:0019972	feature_id[165].value > threshold=0.6998243927955627
node_187: feature_name=GO:0008054	feature_id[117].value <= threshold=0.26741042733192444
node_188: feature_name=GO:0045185	feature_id[785].value <= threshold=0.20200951397418976
Class: Other lncRNAs
Rules_22	passed counts:67
node_0: feature_name=GO:0006275	feature_id[261].value <= threshold=0.611920565366745
node_1: feature_name=GO:0090162	feature_id[0].value <= threshold=4.428043030202389e-05
node_2: feature_name=GO:0000188	feature_id[37].value > threshold=0.017420049756765366
node_68: feature_name=GO:0032026	feature_id[7].value > threshold=0.413987472653389
node_222: feature_name=GO:0050124	feature_id[476].value <= threshold=0.0037437553983181715
node_223: feature_name=GO:0044795	feature_id[915].value <= threshold=0.4820440113544464
node_224: feature_name=GO:0004961	feature_id[259].value <= threshold=0.0033755330368876457
node_225: feature_name=GO:0072697	feature_id[27].value <= threshold=0.0008307198877446353
node_226: feature_name=GO:0030860	feature_id[107].value <= threshold=0.0011463169939815998
node_227: feature_name=GO:0070011	feature_id[15].value > threshold=5.0708380513242446e-05
node_231: feature_name=GO:0090150	feature_id[213].value > threshold=0.6476474404335022
node_233: feature_name=GO:0090150	feature_id[213].value > threshold=0.6497142016887665
Class: Other lncRNAs
Rules_23	passed counts:60
node_0: feature_name=GO:0006275	feature_id[261].value <= threshold=0.611920565366745
node_1: feature_name=GO:0090162	feature_id[0].value > threshold=4.428043030202389e-05
node_253: feature_name=GO:0071617	feature_id[203].value <= threshold=0.542830616235733
node_254: feature_name=GO:0048934	feature_id[86].value <= threshold=0.6984235048294067
node_255: feature_name=GO:0031492	feature_id[671].value <= threshold=0.22999948263168335
node_256: feature_name=GO:2000052	feature_id[602].value <= threshold=1.058824062347412
node_257: feature_name=GO:0001697	feature_id[173].value <= threshold=1.4856967329978943
node_258: feature_name=GO:2000323	feature_id[91].value <= threshold=0.3833317458629608
node_259: feature_name=GO:0051861	feature_id[280].value <= threshold=0.814757764339447
node_260: feature_name=GO:0090344	feature_id[832].value > threshold=0.28676562011241913
Class: Other lncRNAs
Rules_24	passed counts:59
node_0: feature_name=GO:0006275	feature_id[261].value <= threshold=0.611920565366745
node_1: feature_name=GO:0090162	feature_id[0].value <= threshold=4.428043030202389e-05
node_2: feature_name=GO:0000188	feature_id[37].value <= threshold=0.017420049756765366
node_3: feature_name=GO:0034720	feature_id[532].value <= threshold=0.0011523710563778877
node_4: feature_name=GO:0017182	feature_id[3].value > threshold=0.0012494438560679555
node_32: feature_name=GO:0048066	feature_id[148].value <= threshold=0.0005970586789771914
node_33: feature_name=GO:0017178	feature_id[40].value <= threshold=2.7996835708618164
Class: Other lncRNAs
Rules_25	passed counts:52
node_0: feature_name=GO:0006275	feature_id[261].value <= threshold=0.611920565366745
node_1: feature_name=GO:0090162	feature_id[0].value <= threshold=4.428043030202389e-05
node_2: feature_name=GO:0000188	feature_id[37].value > threshold=0.017420049756765366
node_68: feature_name=GO:0032026	feature_id[7].value <= threshold=0.413987472653389
node_69: feature_name=GO:0009301	feature_id[404].value <= threshold=0.23043984174728394
node_70: feature_name=GO:0030511	feature_id[508].value <= threshold=0.5425670146942139
node_71: feature_name=GO:0051582	feature_id[102].value <= threshold=0.48802419006824493
node_72: feature_name=GO:0002793	feature_id[597].value > threshold=0.07235005870461464
node_102: feature_name=GO:0005845	feature_id[540].value <= threshold=0.25623150169849396
node_103: feature_name=GO:0030202	feature_id[643].value <= threshold=0.23878131806850433
node_104: feature_name=GO:0051861	feature_id[280].value > threshold=0.5233777463436127
Class: Other lncRNAs
Rules_26	passed counts:42
node_0: feature_name=GO:0006275	feature_id[261].value <= threshold=0.611920565366745
node_1: feature_name=GO:0090162	feature_id[0].value <= threshold=4.428043030202389e-05
node_2: feature_name=GO:0000188	feature_id[37].value > threshold=0.017420049756765366
node_68: feature_name=GO:0032026	feature_id[7].value <= threshold=0.413987472653389
node_69: feature_name=GO:0009301	feature_id[404].value <= threshold=0.23043984174728394
node_70: feature_name=GO:0030511	feature_id[508].value <= threshold=0.5425670146942139
node_71: feature_name=GO:0051582	feature_id[102].value <= threshold=0.48802419006824493
node_72: feature_name=GO:0002793	feature_id[597].value <= threshold=0.07235005870461464
node_73: feature_name=GO:0035315	feature_id[670].value <= threshold=0.19600238651037216
node_74: feature_name=GO:0034720	feature_id[532].value > threshold=0.014872608706355095
node_84: feature_name=GO:0090344	feature_id[832].value > threshold=0.19452186673879623
Class: Other lncRNAs
Rules_27	passed counts:39
node_0: feature_name=GO:0006275	feature_id[261].value <= threshold=0.611920565366745
node_1: feature_name=GO:0090162	feature_id[0].value > threshold=4.428043030202389e-05
node_253: feature_name=GO:0071617	feature_id[203].value <= threshold=0.542830616235733
node_254: feature_name=GO:0048934	feature_id[86].value <= threshold=0.6984235048294067
node_255: feature_name=GO:0031492	feature_id[671].value <= threshold=0.22999948263168335
node_256: feature_name=GO:2000052	feature_id[602].value <= threshold=1.058824062347412
node_257: feature_name=GO:0001697	feature_id[173].value > threshold=1.4856967329978943
node_441: feature_name=GO:0001697	feature_id[173].value > threshold=1.494957149028778
node_445: feature_name=GO:0002793	feature_id[597].value > threshold=0.1971605122089386
Class: Other lncRNAs
Rules_28	passed counts:37
node_0: feature_name=GO:0006275	feature_id[261].value <= threshold=0.611920565366745
node_1: feature_name=GO:0090162	feature_id[0].value > threshold=4.428043030202389e-05
node_253: feature_name=GO:0071617	feature_id[203].value <= threshold=0.542830616235733
node_254: feature_name=GO:0048934	feature_id[86].value <= threshold=0.6984235048294067
node_255: feature_name=GO:0031492	feature_id[671].value <= threshold=0.22999948263168335
node_256: feature_name=GO:2000052	feature_id[602].value <= threshold=1.058824062347412
node_257: feature_name=GO:0001697	feature_id[173].value <= threshold=1.4856967329978943
node_258: feature_name=GO:2000323	feature_id[91].value <= threshold=0.3833317458629608
node_259: feature_name=GO:0051861	feature_id[280].value <= threshold=0.814757764339447
node_260: feature_name=GO:0090344	feature_id[832].value <= threshold=0.28676562011241913
node_261: feature_name=GO:0003690	feature_id[479].value > threshold=0.00011137216642964631
node_267: feature_name=GO:0016895	feature_id[897].value > threshold=0.48792417347431183
Class: Other lncRNAs
Rules_29	passed counts:36
node_0: feature_name=GO:0006275	feature_id[261].value <= threshold=0.611920565366745
node_1: feature_name=GO:0090162	feature_id[0].value <= threshold=4.428043030202389e-05
node_2: feature_name=GO:0000188	feature_id[37].value > threshold=0.017420049756765366
node_68: feature_name=GO:0032026	feature_id[7].value <= threshold=0.413987472653389
node_69: feature_name=GO:0009301	feature_id[404].value <= threshold=0.23043984174728394
node_70: feature_name=GO:0030511	feature_id[508].value <= threshold=0.5425670146942139
node_71: feature_name=GO:0051582	feature_id[102].value <= threshold=0.48802419006824493
node_72: feature_name=GO:0002793	feature_id[597].value > threshold=0.07235005870461464
node_102: feature_name=GO:0005845	feature_id[540].value <= threshold=0.25623150169849396
node_103: feature_name=GO:0030202	feature_id[643].value <= threshold=0.23878131806850433
node_104: feature_name=GO:0051861	feature_id[280].value <= threshold=0.5233777463436127
node_105: feature_name=GO:0035335	feature_id[218].value > threshold=0.7517804801464081
Class: Other lncRNAs
Rules_30	passed counts:34
node_0: feature_name=GO:0006275	feature_id[261].value <= threshold=0.611920565366745
node_1: feature_name=GO:0090162	feature_id[0].value <= threshold=4.428043030202389e-05
node_2: feature_name=GO:0000188	feature_id[37].value > threshold=0.017420049756765366
node_68: feature_name=GO:0032026	feature_id[7].value > threshold=0.413987472653389
node_222: feature_name=GO:0050124	feature_id[476].value <= threshold=0.0037437553983181715
node_223: feature_name=GO:0044795	feature_id[915].value <= threshold=0.4820440113544464
node_224: feature_name=GO:0004961	feature_id[259].value <= threshold=0.0033755330368876457
node_225: feature_name=GO:0072697	feature_id[27].value <= threshold=0.0008307198877446353
node_226: feature_name=GO:0030860	feature_id[107].value <= threshold=0.0011463169939815998
node_227: feature_name=GO:0070011	feature_id[15].value <= threshold=5.0708380513242446e-05
node_228: feature_name=GO:1901799	feature_id[23].value <= threshold=0.3714662194252014
Class: Other lncRNAs
Rules_31	passed counts:27
node_0: feature_name=GO:0006275	feature_id[261].value <= threshold=0.611920565366745
node_1: feature_name=GO:0090162	feature_id[0].value > threshold=4.428043030202389e-05
node_253: feature_name=GO:0071617	feature_id[203].value <= threshold=0.542830616235733
node_254: feature_name=GO:0048934	feature_id[86].value <= threshold=0.6984235048294067
node_255: feature_name=GO:0031492	feature_id[671].value <= threshold=0.22999948263168335
node_256: feature_name=GO:2000052	feature_id[602].value <= threshold=1.058824062347412
node_257: feature_name=GO:0001697	feature_id[173].value <= threshold=1.4856967329978943
node_258: feature_name=GO:2000323	feature_id[91].value <= threshold=0.3833317458629608
node_259: feature_name=GO:0051861	feature_id[280].value <= threshold=0.814757764339447
node_260: feature_name=GO:0090344	feature_id[832].value <= threshold=0.28676562011241913
node_261: feature_name=GO:0003690	feature_id[479].value > threshold=0.00011137216642964631
node_267: feature_name=GO:0016895	feature_id[897].value <= threshold=0.48792417347431183
node_268: feature_name=GO:0050901	feature_id[175].value <= threshold=1.6129865050315857
node_269: feature_name=GO:0021903	feature_id[211].value <= threshold=0.9824570417404175
node_270: feature_name=GO:0051534	feature_id[945].value > threshold=0.5949008762836456
node_422: feature_name=GO:0045185	feature_id[785].value > threshold=0.14628300815820694
Class: Other lncRNAs
Rules_32	passed counts:26
node_0: feature_name=GO:0006275	feature_id[261].value <= threshold=0.611920565366745
node_1: feature_name=GO:0090162	feature_id[0].value <= threshold=4.428043030202389e-05
node_2: feature_name=GO:0000188	feature_id[37].value <= threshold=0.017420049756765366
node_3: feature_name=GO:0034720	feature_id[532].value > threshold=0.0011523710563778877
node_47: feature_name=GO:0090150	feature_id[213].value > threshold=0.0008717003074707463
node_51: feature_name=GO:0035335	feature_id[218].value > threshold=0.136051207780838
Class: Other lncRNAs
Rules_33	passed counts:25
node_0: feature_name=GO:0006275	feature_id[261].value <= threshold=0.611920565366745
node_1: feature_name=GO:0090162	feature_id[0].value > threshold=4.428043030202389e-05
node_253: feature_name=GO:0071617	feature_id[203].value <= threshold=0.542830616235733
node_254: feature_name=GO:0048934	feature_id[86].value <= threshold=0.6984235048294067
node_255: feature_name=GO:0031492	feature_id[671].value <= threshold=0.22999948263168335
node_256: feature_name=GO:2000052	feature_id[602].value <= threshold=1.058824062347412
node_257: feature_name=GO:0001697	feature_id[173].value <= threshold=1.4856967329978943
node_258: feature_name=GO:2000323	feature_id[91].value <= threshold=0.3833317458629608
node_259: feature_name=GO:0051861	feature_id[280].value <= threshold=0.814757764339447
node_260: feature_name=GO:0090344	feature_id[832].value <= threshold=0.28676562011241913
node_261: feature_name=GO:0003690	feature_id[479].value > threshold=0.00011137216642964631
node_267: feature_name=GO:0016895	feature_id[897].value <= threshold=0.48792417347431183
node_268: feature_name=GO:0050901	feature_id[175].value > threshold=1.6129865050315857
Class: Other lncRNAs
Rules_34	passed counts:25
node_0: feature_name=GO:0006275	feature_id[261].value <= threshold=0.611920565366745
node_1: feature_name=GO:0090162	feature_id[0].value <= threshold=4.428043030202389e-05
node_2: feature_name=GO:0000188	feature_id[37].value > threshold=0.017420049756765366
node_68: feature_name=GO:0032026	feature_id[7].value <= threshold=0.413987472653389
node_69: feature_name=GO:0009301	feature_id[404].value <= threshold=0.23043984174728394
node_70: feature_name=GO:0030511	feature_id[508].value <= threshold=0.5425670146942139
node_71: feature_name=GO:0051582	feature_id[102].value <= threshold=0.48802419006824493
node_72: feature_name=GO:0002793	feature_id[597].value > threshold=0.07235005870461464
node_102: feature_name=GO:0005845	feature_id[540].value <= threshold=0.25623150169849396
node_103: feature_name=GO:0030202	feature_id[643].value <= threshold=0.23878131806850433
node_104: feature_name=GO:0051861	feature_id[280].value <= threshold=0.5233777463436127
node_105: feature_name=GO:0035335	feature_id[218].value <= threshold=0.7517804801464081
node_106: feature_name=GO:0043006	feature_id[813].value > threshold=0.752539187669754
Class: Other lncRNAs
Rules_35	passed counts:23
node_0: feature_name=GO:0006275	feature_id[261].value <= threshold=0.611920565366745
node_1: feature_name=GO:0090162	feature_id[0].value <= threshold=4.428043030202389e-05
node_2: feature_name=GO:0000188	feature_id[37].value > threshold=0.017420049756765366
node_68: feature_name=GO:0032026	feature_id[7].value <= threshold=0.413987472653389
node_69: feature_name=GO:0009301	feature_id[404].value > threshold=0.23043984174728394
node_209: feature_name=GO:0035253	feature_id[54].value <= threshold=0.7398464977741241
node_210: feature_name=GO:0000023	feature_id[112].value <= threshold=0.041387733072042465
node_211: feature_name=GO:0035253	feature_id[54].value > threshold=0.7172553837299347
node_213: feature_name=GO:0006420	feature_id[840].value <= threshold=0.5906166434288025
Class: Other lncRNAs
Rules_36	passed counts:22
node_0: feature_name=GO:0006275	feature_id[261].value <= threshold=0.611920565366745
node_1: feature_name=GO:0090162	feature_id[0].value > threshold=4.428043030202389e-05
node_253: feature_name=GO:0071617	feature_id[203].value <= threshold=0.542830616235733
node_254: feature_name=GO:0048934	feature_id[86].value <= threshold=0.6984235048294067
node_255: feature_name=GO:0031492	feature_id[671].value <= threshold=0.22999948263168335
node_256: feature_name=GO:2000052	feature_id[602].value <= threshold=1.058824062347412
node_257: feature_name=GO:0001697	feature_id[173].value <= threshold=1.4856967329978943
node_258: feature_name=GO:2000323	feature_id[91].value <= threshold=0.3833317458629608
node_259: feature_name=GO:0051861	feature_id[280].value <= threshold=0.814757764339447
node_260: feature_name=GO:0090344	feature_id[832].value <= threshold=0.28676562011241913
node_261: feature_name=GO:0003690	feature_id[479].value > threshold=0.00011137216642964631
node_267: feature_name=GO:0016895	feature_id[897].value <= threshold=0.48792417347431183
node_268: feature_name=GO:0050901	feature_id[175].value <= threshold=1.6129865050315857
node_269: feature_name=GO:0021903	feature_id[211].value > threshold=0.9824570417404175
node_427: feature_name=GO:0002793	feature_id[597].value <= threshold=0.5952905118465424
Class: Other lncRNAs
Rules_37	passed counts:21
node_0: feature_name=GO:0006275	feature_id[261].value <= threshold=0.611920565366745
node_1: feature_name=GO:0090162	feature_id[0].value <= threshold=4.428043030202389e-05
node_2: feature_name=GO:0000188	feature_id[37].value > threshold=0.017420049756765366
node_68: feature_name=GO:0032026	feature_id[7].value <= threshold=0.413987472653389
node_69: feature_name=GO:0009301	feature_id[404].value > threshold=0.23043984174728394
node_209: feature_name=GO:0035253	feature_id[54].value > threshold=0.7398464977741241
node_217: feature_name=GO:0042438	feature_id[587].value <= threshold=0.7921205461025238
Class: Other lncRNAs
Rules_38	passed counts:20
node_0: feature_name=GO:0006275	feature_id[261].value > threshold=0.611920565366745
node_462: feature_name=GO:2000642	feature_id[20].value <= threshold=0.6624273061752319
node_463: feature_name=GO:0035105	feature_id[46].value <= threshold=2.0055588483810425
node_464: feature_name=GO:2000299	feature_id[31].value <= threshold=1.0164494514465332
node_465: feature_name=GO:0006275	feature_id[261].value <= threshold=0.6121423840522766
node_466: feature_name=GO:0070011	feature_id[15].value <= threshold=1.6098740100860596
Class: Other lncRNAs
Rules_39	passed counts:20
node_0: feature_name=GO:0006275	feature_id[261].value <= threshold=0.611920565366745
node_1: feature_name=GO:0090162	feature_id[0].value <= threshold=4.428043030202389e-05
node_2: feature_name=GO:0000188	feature_id[37].value > threshold=0.017420049756765366
node_68: feature_name=GO:0032026	feature_id[7].value <= threshold=0.413987472653389
node_69: feature_name=GO:0009301	feature_id[404].value <= threshold=0.23043984174728394
node_70: feature_name=GO:0030511	feature_id[508].value <= threshold=0.5425670146942139
node_71: feature_name=GO:0051582	feature_id[102].value <= threshold=0.48802419006824493
node_72: feature_name=GO:0002793	feature_id[597].value > threshold=0.07235005870461464
node_102: feature_name=GO:0005845	feature_id[540].value <= threshold=0.25623150169849396
node_103: feature_name=GO:0030202	feature_id[643].value <= threshold=0.23878131806850433
node_104: feature_name=GO:0051861	feature_id[280].value <= threshold=0.5233777463436127
node_105: feature_name=GO:0035335	feature_id[218].value <= threshold=0.7517804801464081
node_106: feature_name=GO:0043006	feature_id[813].value <= threshold=0.752539187669754
node_107: feature_name=GO:0019972	feature_id[165].value > threshold=0.6998243927955627
node_187: feature_name=GO:0008054	feature_id[117].value <= threshold=0.26741042733192444
node_188: feature_name=GO:0045185	feature_id[785].value > threshold=0.20200951397418976
node_190: feature_name=GO:0070011	feature_id[15].value > threshold=1.6052147150039673
node_192: feature_name=GO:0090344	feature_id[832].value > threshold=0.3204812705516815
node_194: feature_name=GO:0008233	feature_id[627].value <= threshold=1.8503342270851135
node_195: feature_name=GO:0070652	feature_id[347].value <= threshold=0.4624021500349045
Class: Other lncRNAs
Rules_40	passed counts:19
node_0: feature_name=GO:0006275	feature_id[261].value <= threshold=0.611920565366745
node_1: feature_name=GO:0090162	feature_id[0].value <= threshold=4.428043030202389e-05
node_2: feature_name=GO:0000188	feature_id[37].value <= threshold=0.017420049756765366
node_3: feature_name=GO:0034720	feature_id[532].value <= threshold=0.0011523710563778877
node_4: feature_name=GO:0017182	feature_id[3].value > threshold=0.0012494438560679555
node_32: feature_name=GO:0048066	feature_id[148].value > threshold=0.0005970586789771914
node_36: feature_name=GO:0002793	feature_id[597].value > threshold=0.044548606500029564
Class: Other lncRNAs
Rules_41	passed counts:18
node_0: feature_name=GO:0006275	feature_id[261].value <= threshold=0.611920565366745
node_1: feature_name=GO:0090162	feature_id[0].value > threshold=4.428043030202389e-05
node_253: feature_name=GO:0071617	feature_id[203].value <= threshold=0.542830616235733
node_254: feature_name=GO:0048934	feature_id[86].value <= threshold=0.6984235048294067
node_255: feature_name=GO:0031492	feature_id[671].value <= threshold=0.22999948263168335
node_256: feature_name=GO:2000052	feature_id[602].value <= threshold=1.058824062347412
node_257: feature_name=GO:0001697	feature_id[173].value <= threshold=1.4856967329978943
node_258: feature_name=GO:2000323	feature_id[91].value <= threshold=0.3833317458629608
node_259: feature_name=GO:0051861	feature_id[280].value <= threshold=0.814757764339447
node_260: feature_name=GO:0090344	feature_id[832].value <= threshold=0.28676562011241913
node_261: feature_name=GO:0003690	feature_id[479].value > threshold=0.00011137216642964631
node_267: feature_name=GO:0016895	feature_id[897].value <= threshold=0.48792417347431183
node_268: feature_name=GO:0050901	feature_id[175].value <= threshold=1.6129865050315857
node_269: feature_name=GO:0021903	feature_id[211].value <= threshold=0.9824570417404175
node_270: feature_name=GO:0051534	feature_id[945].value <= threshold=0.5949008762836456
node_271: feature_name=GO:1900006	feature_id[697].value > threshold=0.3523732125759125
Class: Other lncRNAs
Rules_42	passed counts:17
node_0: feature_name=GO:0006275	feature_id[261].value <= threshold=0.611920565366745
node_1: feature_name=GO:0090162	feature_id[0].value > threshold=4.428043030202389e-05
node_253: feature_name=GO:0071617	feature_id[203].value <= threshold=0.542830616235733
node_254: feature_name=GO:0048934	feature_id[86].value <= threshold=0.6984235048294067
node_255: feature_name=GO:0031492	feature_id[671].value <= threshold=0.22999948263168335
node_256: feature_name=GO:2000052	feature_id[602].value <= threshold=1.058824062347412
node_257: feature_name=GO:0001697	feature_id[173].value <= threshold=1.4856967329978943
node_258: feature_name=GO:2000323	feature_id[91].value <= threshold=0.3833317458629608
node_259: feature_name=GO:0051861	feature_id[280].value <= threshold=0.814757764339447
node_260: feature_name=GO:0090344	feature_id[832].value <= threshold=0.28676562011241913
node_261: feature_name=GO:0003690	feature_id[479].value > threshold=0.00011137216642964631
node_267: feature_name=GO:0016895	feature_id[897].value <= threshold=0.48792417347431183
node_268: feature_name=GO:0050901	feature_id[175].value <= threshold=1.6129865050315857
node_269: feature_name=GO:0021903	feature_id[211].value <= threshold=0.9824570417404175
node_270: feature_name=GO:0051534	feature_id[945].value <= threshold=0.5949008762836456
node_271: feature_name=GO:1900006	feature_id[697].value <= threshold=0.3523732125759125
node_272: feature_name=GO:0016755	feature_id[874].value > threshold=0.9256992340087891
Class: Other lncRNAs
Rules_43	passed counts:16
node_0: feature_name=GO:0006275	feature_id[261].value <= threshold=0.611920565366745
node_1: feature_name=GO:0090162	feature_id[0].value > threshold=4.428043030202389e-05
node_253: feature_name=GO:0071617	feature_id[203].value <= threshold=0.542830616235733
node_254: feature_name=GO:0048934	feature_id[86].value <= threshold=0.6984235048294067
node_255: feature_name=GO:0031492	feature_id[671].value <= threshold=0.22999948263168335
node_256: feature_name=GO:2000052	feature_id[602].value <= threshold=1.058824062347412
node_257: feature_name=GO:0001697	feature_id[173].value <= threshold=1.4856967329978943
node_258: feature_name=GO:2000323	feature_id[91].value <= threshold=0.3833317458629608
node_259: feature_name=GO:0051861	feature_id[280].value <= threshold=0.814757764339447
node_260: feature_name=GO:0090344	feature_id[832].value <= threshold=0.28676562011241913
node_261: feature_name=GO:0003690	feature_id[479].value > threshold=0.00011137216642964631
node_267: feature_name=GO:0016895	feature_id[897].value <= threshold=0.48792417347431183
node_268: feature_name=GO:0050901	feature_id[175].value <= threshold=1.6129865050315857
node_269: feature_name=GO:0021903	feature_id[211].value <= threshold=0.9824570417404175
node_270: feature_name=GO:0051534	feature_id[945].value <= threshold=0.5949008762836456
node_271: feature_name=GO:1900006	feature_id[697].value <= threshold=0.3523732125759125
node_272: feature_name=GO:0016755	feature_id[874].value <= threshold=0.9256992340087891
node_273: feature_name=GO:0031308	feature_id[875].value > threshold=1.1520193219184875
Class: Other lncRNAs
Rules_44	passed counts:15
node_0: feature_name=GO:0006275	feature_id[261].value <= threshold=0.611920565366745
node_1: feature_name=GO:0090162	feature_id[0].value <= threshold=4.428043030202389e-05
node_2: feature_name=GO:0000188	feature_id[37].value > threshold=0.017420049756765366
node_68: feature_name=GO:0032026	feature_id[7].value <= threshold=0.413987472653389
node_69: feature_name=GO:0009301	feature_id[404].value <= threshold=0.23043984174728394
node_70: feature_name=GO:0030511	feature_id[508].value <= threshold=0.5425670146942139
node_71: feature_name=GO:0051582	feature_id[102].value <= threshold=0.48802419006824493
node_72: feature_name=GO:0002793	feature_id[597].value > threshold=0.07235005870461464
node_102: feature_name=GO:0005845	feature_id[540].value <= threshold=0.25623150169849396
node_103: feature_name=GO:0030202	feature_id[643].value <= threshold=0.23878131806850433
node_104: feature_name=GO:0051861	feature_id[280].value <= threshold=0.5233777463436127
node_105: feature_name=GO:0035335	feature_id[218].value <= threshold=0.7517804801464081
node_106: feature_name=GO:0043006	feature_id[813].value <= threshold=0.752539187669754
node_107: feature_name=GO:0019972	feature_id[165].value <= threshold=0.6998243927955627
node_108: feature_name=GO:0002832	feature_id[379].value > threshold=0.8526075184345245
Class: Other lncRNAs
Rules_45	passed counts:14
node_0: feature_name=GO:0006275	feature_id[261].value <= threshold=0.611920565366745
node_1: feature_name=GO:0090162	feature_id[0].value > threshold=4.428043030202389e-05
node_253: feature_name=GO:0071617	feature_id[203].value <= threshold=0.542830616235733
node_254: feature_name=GO:0048934	feature_id[86].value <= threshold=0.6984235048294067
node_255: feature_name=GO:0031492	feature_id[671].value <= threshold=0.22999948263168335
node_256: feature_name=GO:2000052	feature_id[602].value <= threshold=1.058824062347412
node_257: feature_name=GO:0001697	feature_id[173].value <= threshold=1.4856967329978943
node_258: feature_name=GO:2000323	feature_id[91].value <= threshold=0.3833317458629608
node_259: feature_name=GO:0051861	feature_id[280].value <= threshold=0.814757764339447
node_260: feature_name=GO:0090344	feature_id[832].value <= threshold=0.28676562011241913
node_261: feature_name=GO:0003690	feature_id[479].value > threshold=0.00011137216642964631
node_267: feature_name=GO:0016895	feature_id[897].value <= threshold=0.48792417347431183
node_268: feature_name=GO:0050901	feature_id[175].value <= threshold=1.6129865050315857
node_269: feature_name=GO:0021903	feature_id[211].value <= threshold=0.9824570417404175
node_270: feature_name=GO:0051534	feature_id[945].value <= threshold=0.5949008762836456
node_271: feature_name=GO:1900006	feature_id[697].value <= threshold=0.3523732125759125
node_272: feature_name=GO:0016755	feature_id[874].value <= threshold=0.9256992340087891
node_273: feature_name=GO:0031308	feature_id[875].value <= threshold=1.1520193219184875
node_274: feature_name=GO:0006971	feature_id[358].value <= threshold=1.1031953692436218
node_275: feature_name=GO:0008589	feature_id[722].value > threshold=3.153539538383484
Class: Other lncRNAs
Rules_46	passed counts:13
node_0: feature_name=GO:0006275	feature_id[261].value <= threshold=0.611920565366745
node_1: feature_name=GO:0090162	feature_id[0].value > threshold=4.428043030202389e-05
node_253: feature_name=GO:0071617	feature_id[203].value <= threshold=0.542830616235733
node_254: feature_name=GO:0048934	feature_id[86].value <= threshold=0.6984235048294067
node_255: feature_name=GO:0031492	feature_id[671].value <= threshold=0.22999948263168335
node_256: feature_name=GO:2000052	feature_id[602].value <= threshold=1.058824062347412
node_257: feature_name=GO:0001697	feature_id[173].value <= threshold=1.4856967329978943
node_258: feature_name=GO:2000323	feature_id[91].value <= threshold=0.3833317458629608
node_259: feature_name=GO:0051861	feature_id[280].value <= threshold=0.814757764339447
node_260: feature_name=GO:0090344	feature_id[832].value <= threshold=0.28676562011241913
node_261: feature_name=GO:0003690	feature_id[479].value > threshold=0.00011137216642964631
node_267: feature_name=GO:0016895	feature_id[897].value <= threshold=0.48792417347431183
node_268: feature_name=GO:0050901	feature_id[175].value <= threshold=1.6129865050315857
node_269: feature_name=GO:0021903	feature_id[211].value <= threshold=0.9824570417404175
node_270: feature_name=GO:0051534	feature_id[945].value <= threshold=0.5949008762836456
node_271: feature_name=GO:1900006	feature_id[697].value <= threshold=0.3523732125759125
node_272: feature_name=GO:0016755	feature_id[874].value <= threshold=0.9256992340087891
node_273: feature_name=GO:0031308	feature_id[875].value <= threshold=1.1520193219184875
node_274: feature_name=GO:0006971	feature_id[358].value > threshold=1.1031953692436218
node_412: feature_name=GO:0021903	feature_id[211].value <= threshold=0.0006785722798667848
node_413: feature_name=GO:0045185	feature_id[785].value > threshold=0.12683483213186264
Class: Other lncRNAs
Rules_47	passed counts:13
node_0: feature_name=GO:0006275	feature_id[261].value <= threshold=0.611920565366745
node_1: feature_name=GO:0090162	feature_id[0].value <= threshold=4.428043030202389e-05
node_2: feature_name=GO:0000188	feature_id[37].value > threshold=0.017420049756765366
node_68: feature_name=GO:0032026	feature_id[7].value <= threshold=0.413987472653389
node_69: feature_name=GO:0009301	feature_id[404].value <= threshold=0.23043984174728394
node_70: feature_name=GO:0030511	feature_id[508].value <= threshold=0.5425670146942139
node_71: feature_name=GO:0051582	feature_id[102].value <= threshold=0.48802419006824493
node_72: feature_name=GO:0002793	feature_id[597].value > threshold=0.07235005870461464
node_102: feature_name=GO:0005845	feature_id[540].value <= threshold=0.25623150169849396
node_103: feature_name=GO:0030202	feature_id[643].value <= threshold=0.23878131806850433
node_104: feature_name=GO:0051861	feature_id[280].value <= threshold=0.5233777463436127
node_105: feature_name=GO:0035335	feature_id[218].value <= threshold=0.7517804801464081
node_106: feature_name=GO:0043006	feature_id[813].value <= threshold=0.752539187669754
node_107: feature_name=GO:0019972	feature_id[165].value <= threshold=0.6998243927955627
node_108: feature_name=GO:0002832	feature_id[379].value <= threshold=0.8526075184345245
node_109: feature_name=GO:0006359	feature_id[967].value > threshold=0.5934928953647614
node_183: feature_name=GO:0002793	feature_id[597].value > threshold=0.23250366002321243
Class: Other lncRNAs
Rules_48	passed counts:13
node_0: feature_name=GO:0006275	feature_id[261].value <= threshold=0.611920565366745
node_1: feature_name=GO:0090162	feature_id[0].value <= threshold=4.428043030202389e-05
node_2: feature_name=GO:0000188	feature_id[37].value > threshold=0.017420049756765366
node_68: feature_name=GO:0032026	feature_id[7].value <= threshold=0.413987472653389
node_69: feature_name=GO:0009301	feature_id[404].value <= threshold=0.23043984174728394
node_70: feature_name=GO:0030511	feature_id[508].value <= threshold=0.5425670146942139
node_71: feature_name=GO:0051582	feature_id[102].value <= threshold=0.48802419006824493
node_72: feature_name=GO:0002793	feature_id[597].value > threshold=0.07235005870461464
node_102: feature_name=GO:0005845	feature_id[540].value <= threshold=0.25623150169849396
node_103: feature_name=GO:0030202	feature_id[643].value <= threshold=0.23878131806850433
node_104: feature_name=GO:0051861	feature_id[280].value <= threshold=0.5233777463436127
node_105: feature_name=GO:0035335	feature_id[218].value <= threshold=0.7517804801464081
node_106: feature_name=GO:0043006	feature_id[813].value <= threshold=0.752539187669754
node_107: feature_name=GO:0019972	feature_id[165].value <= threshold=0.6998243927955627
node_108: feature_name=GO:0002832	feature_id[379].value <= threshold=0.8526075184345245
node_109: feature_name=GO:0006359	feature_id[967].value <= threshold=0.5934928953647614
node_110: feature_name=GO:0032328	feature_id[103].value > threshold=0.7218275368213654
Class: Other lncRNAs
Rules_49	passed counts:13
node_0: feature_name=GO:0006275	feature_id[261].value <= threshold=0.611920565366745
node_1: feature_name=GO:0090162	feature_id[0].value <= threshold=4.428043030202389e-05
node_2: feature_name=GO:0000188	feature_id[37].value > threshold=0.017420049756765366
node_68: feature_name=GO:0032026	feature_id[7].value <= threshold=0.413987472653389
node_69: feature_name=GO:0009301	feature_id[404].value <= threshold=0.23043984174728394
node_70: feature_name=GO:0030511	feature_id[508].value <= threshold=0.5425670146942139
node_71: feature_name=GO:0051582	feature_id[102].value <= threshold=0.48802419006824493
node_72: feature_name=GO:0002793	feature_id[597].value <= threshold=0.07235005870461464
node_73: feature_name=GO:0035315	feature_id[670].value <= threshold=0.19600238651037216
node_74: feature_name=GO:0034720	feature_id[532].value <= threshold=0.014872608706355095
node_75: feature_name=GO:0000188	feature_id[37].value <= threshold=0.10404785349965096
node_76: feature_name=GO:0005845	feature_id[540].value > threshold=0.11270355433225632
Class: Other lncRNAs
Rules_50	passed counts:12
node_0: feature_name=GO:0006275	feature_id[261].value <= threshold=0.611920565366745
node_1: feature_name=GO:0090162	feature_id[0].value > threshold=4.428043030202389e-05
node_253: feature_name=GO:0071617	feature_id[203].value <= threshold=0.542830616235733
node_254: feature_name=GO:0048934	feature_id[86].value <= threshold=0.6984235048294067
node_255: feature_name=GO:0031492	feature_id[671].value <= threshold=0.22999948263168335
node_256: feature_name=GO:2000052	feature_id[602].value <= threshold=1.058824062347412
node_257: feature_name=GO:0001697	feature_id[173].value <= threshold=1.4856967329978943
node_258: feature_name=GO:2000323	feature_id[91].value <= threshold=0.3833317458629608
node_259: feature_name=GO:0051861	feature_id[280].value <= threshold=0.814757764339447
node_260: feature_name=GO:0090344	feature_id[832].value <= threshold=0.28676562011241913
node_261: feature_name=GO:0003690	feature_id[479].value > threshold=0.00011137216642964631
node_267: feature_name=GO:0016895	feature_id[897].value <= threshold=0.48792417347431183
node_268: feature_name=GO:0050901	feature_id[175].value <= threshold=1.6129865050315857
node_269: feature_name=GO:0021903	feature_id[211].value <= threshold=0.9824570417404175
node_270: feature_name=GO:0051534	feature_id[945].value <= threshold=0.5949008762836456
node_271: feature_name=GO:1900006	feature_id[697].value <= threshold=0.3523732125759125
node_272: feature_name=GO:0016755	feature_id[874].value <= threshold=0.9256992340087891
node_273: feature_name=GO:0031308	feature_id[875].value <= threshold=1.1520193219184875
node_274: feature_name=GO:0006971	feature_id[358].value <= threshold=1.1031953692436218
node_275: feature_name=GO:0008589	feature_id[722].value <= threshold=3.153539538383484
node_276: feature_name=GO:0016406	feature_id[70].value > threshold=1.0396768450737
Class: Other lncRNAs
Rules_51	passed counts:11
node_0: feature_name=GO:0006275	feature_id[261].value <= threshold=0.611920565366745
node_1: feature_name=GO:0090162	feature_id[0].value > threshold=4.428043030202389e-05
node_253: feature_name=GO:0071617	feature_id[203].value <= threshold=0.542830616235733
node_254: feature_name=GO:0048934	feature_id[86].value <= threshold=0.6984235048294067
node_255: feature_name=GO:0031492	feature_id[671].value <= threshold=0.22999948263168335
node_256: feature_name=GO:2000052	feature_id[602].value <= threshold=1.058824062347412
node_257: feature_name=GO:0001697	feature_id[173].value <= threshold=1.4856967329978943
node_258: feature_name=GO:2000323	feature_id[91].value <= threshold=0.3833317458629608
node_259: feature_name=GO:0051861	feature_id[280].value <= threshold=0.814757764339447
node_260: feature_name=GO:0090344	feature_id[832].value <= threshold=0.28676562011241913
node_261: feature_name=GO:0003690	feature_id[479].value > threshold=0.00011137216642964631
node_267: feature_name=GO:0016895	feature_id[897].value <= threshold=0.48792417347431183
node_268: feature_name=GO:0050901	feature_id[175].value <= threshold=1.6129865050315857
node_269: feature_name=GO:0021903	feature_id[211].value <= threshold=0.9824570417404175
node_270: feature_name=GO:0051534	feature_id[945].value <= threshold=0.5949008762836456
node_271: feature_name=GO:1900006	feature_id[697].value <= threshold=0.3523732125759125
node_272: feature_name=GO:0016755	feature_id[874].value <= threshold=0.9256992340087891
node_273: feature_name=GO:0031308	feature_id[875].value <= threshold=1.1520193219184875
node_274: feature_name=GO:0006971	feature_id[358].value <= threshold=1.1031953692436218
node_275: feature_name=GO:0008589	feature_id[722].value <= threshold=3.153539538383484
node_276: feature_name=GO:0016406	feature_id[70].value <= threshold=1.0396768450737
node_277: feature_name=GO:0045263	feature_id[339].value > threshold=5.477336168289185
Class: Other lncRNAs
Rules_52	passed counts:11
node_0: feature_name=GO:0006275	feature_id[261].value <= threshold=0.611920565366745
node_1: feature_name=GO:0090162	feature_id[0].value <= threshold=4.428043030202389e-05
node_2: feature_name=GO:0000188	feature_id[37].value > threshold=0.017420049756765366
node_68: feature_name=GO:0032026	feature_id[7].value > threshold=0.413987472653389
node_222: feature_name=GO:0050124	feature_id[476].value <= threshold=0.0037437553983181715
node_223: feature_name=GO:0044795	feature_id[915].value <= threshold=0.4820440113544464
node_224: feature_name=GO:0004961	feature_id[259].value <= threshold=0.0033755330368876457
node_225: feature_name=GO:0072697	feature_id[27].value <= threshold=0.0008307198877446353
node_226: feature_name=GO:0030860	feature_id[107].value > threshold=0.0011463169939815998
node_238: feature_name=GO:0016581	feature_id[927].value <= threshold=0.6716214716434479
Class: Other lncRNAs
Rules_53	passed counts:11
node_0: feature_name=GO:0006275	feature_id[261].value <= threshold=0.611920565366745
node_1: feature_name=GO:0090162	feature_id[0].value <= threshold=4.428043030202389e-05
node_2: feature_name=GO:0000188	feature_id[37].value > threshold=0.017420049756765366
node_68: feature_name=GO:0032026	feature_id[7].value <= threshold=0.413987472653389
node_69: feature_name=GO:0009301	feature_id[404].value <= threshold=0.23043984174728394
node_70: feature_name=GO:0030511	feature_id[508].value <= threshold=0.5425670146942139
node_71: feature_name=GO:0051582	feature_id[102].value <= threshold=0.48802419006824493
node_72: feature_name=GO:0002793	feature_id[597].value > threshold=0.07235005870461464
node_102: feature_name=GO:0005845	feature_id[540].value <= threshold=0.25623150169849396
node_103: feature_name=GO:0030202	feature_id[643].value <= threshold=0.23878131806850433
node_104: feature_name=GO:0051861	feature_id[280].value <= threshold=0.5233777463436127
node_105: feature_name=GO:0035335	feature_id[218].value <= threshold=0.7517804801464081
node_106: feature_name=GO:0043006	feature_id[813].value <= threshold=0.752539187669754
node_107: feature_name=GO:0019972	feature_id[165].value <= threshold=0.6998243927955627
node_108: feature_name=GO:0002832	feature_id[379].value <= threshold=0.8526075184345245
node_109: feature_name=GO:0006359	feature_id[967].value <= threshold=0.5934928953647614
node_110: feature_name=GO:0032328	feature_id[103].value <= threshold=0.7218275368213654
node_111: feature_name=GO:0004610	feature_id[408].value > threshold=0.5428347587585449
Class: Other lncRNAs
Rules_54	passed counts:10
node_0: feature_name=GO:0006275	feature_id[261].value <= threshold=0.611920565366745
node_1: feature_name=GO:0090162	feature_id[0].value > threshold=4.428043030202389e-05
node_253: feature_name=GO:0071617	feature_id[203].value <= threshold=0.542830616235733
node_254: feature_name=GO:0048934	feature_id[86].value <= threshold=0.6984235048294067
node_255: feature_name=GO:0031492	feature_id[671].value <= threshold=0.22999948263168335
node_256: feature_name=GO:2000052	feature_id[602].value <= threshold=1.058824062347412
node_257: feature_name=GO:0001697	feature_id[173].value <= threshold=1.4856967329978943
node_258: feature_name=GO:2000323	feature_id[91].value <= threshold=0.3833317458629608
node_259: feature_name=GO:0051861	feature_id[280].value <= threshold=0.814757764339447
node_260: feature_name=GO:0090344	feature_id[832].value <= threshold=0.28676562011241913
node_261: feature_name=GO:0003690	feature_id[479].value > threshold=0.00011137216642964631
node_267: feature_name=GO:0016895	feature_id[897].value <= threshold=0.48792417347431183
node_268: feature_name=GO:0050901	feature_id[175].value <= threshold=1.6129865050315857
node_269: feature_name=GO:0021903	feature_id[211].value <= threshold=0.9824570417404175
node_270: feature_name=GO:0051534	feature_id[945].value <= threshold=0.5949008762836456
node_271: feature_name=GO:1900006	feature_id[697].value <= threshold=0.3523732125759125
node_272: feature_name=GO:0016755	feature_id[874].value <= threshold=0.9256992340087891
node_273: feature_name=GO:0031308	feature_id[875].value <= threshold=1.1520193219184875
node_274: feature_name=GO:0006971	feature_id[358].value <= threshold=1.1031953692436218
node_275: feature_name=GO:0008589	feature_id[722].value <= threshold=3.153539538383484
node_276: feature_name=GO:0016406	feature_id[70].value <= threshold=1.0396768450737
node_277: feature_name=GO:0045263	feature_id[339].value <= threshold=5.477336168289185
node_278: feature_name=GO:0090162	feature_id[0].value > threshold=1.5517151951789856
Class: Other lncRNAs
Rules_55	passed counts:10
node_0: feature_name=GO:0006275	feature_id[261].value <= threshold=0.611920565366745
node_1: feature_name=GO:0090162	feature_id[0].value <= threshold=4.428043030202389e-05
node_2: feature_name=GO:0000188	feature_id[37].value > threshold=0.017420049756765366
node_68: feature_name=GO:0032026	feature_id[7].value <= threshold=0.413987472653389
node_69: feature_name=GO:0009301	feature_id[404].value <= threshold=0.23043984174728394
node_70: feature_name=GO:0030511	feature_id[508].value <= threshold=0.5425670146942139
node_71: feature_name=GO:0051582	feature_id[102].value <= threshold=0.48802419006824493
node_72: feature_name=GO:0002793	feature_id[597].value <= threshold=0.07235005870461464
node_73: feature_name=GO:0035315	feature_id[670].value <= threshold=0.19600238651037216
node_74: feature_name=GO:0034720	feature_id[532].value > threshold=0.014872608706355095
node_84: feature_name=GO:0090344	feature_id[832].value <= threshold=0.19452186673879623
node_85: feature_name=GO:0002832	feature_id[379].value > threshold=0.0867212526500225
Class: Other lncRNAs
Rules_56	passed counts:10
node_0: feature_name=GO:0006275	feature_id[261].value <= threshold=0.611920565366745
node_1: feature_name=GO:0090162	feature_id[0].value <= threshold=4.428043030202389e-05
node_2: feature_name=GO:0000188	feature_id[37].value <= threshold=0.017420049756765366
node_3: feature_name=GO:0034720	feature_id[532].value > threshold=0.0011523710563778877
node_47: feature_name=GO:0090150	feature_id[213].value > threshold=0.0008717003074707463
node_51: feature_name=GO:0035335	feature_id[218].value <= threshold=0.136051207780838
node_52: feature_name=GO:0008054	feature_id[117].value > threshold=0.49912822246551514
Class: Other lncRNAs
Rules_57	passed counts:9
node_0: feature_name=GO:0006275	feature_id[261].value <= threshold=0.611920565366745
node_1: feature_name=GO:0090162	feature_id[0].value > threshold=4.428043030202389e-05
node_253: feature_name=GO:0071617	feature_id[203].value <= threshold=0.542830616235733
node_254: feature_name=GO:0048934	feature_id[86].value <= threshold=0.6984235048294067
node_255: feature_name=GO:0031492	feature_id[671].value <= threshold=0.22999948263168335
node_256: feature_name=GO:2000052	feature_id[602].value <= threshold=1.058824062347412
node_257: feature_name=GO:0001697	feature_id[173].value <= threshold=1.4856967329978943
node_258: feature_name=GO:2000323	feature_id[91].value <= threshold=0.3833317458629608
node_259: feature_name=GO:0051861	feature_id[280].value <= threshold=0.814757764339447
node_260: feature_name=GO:0090344	feature_id[832].value <= threshold=0.28676562011241913
node_261: feature_name=GO:0003690	feature_id[479].value > threshold=0.00011137216642964631
node_267: feature_name=GO:0016895	feature_id[897].value <= threshold=0.48792417347431183
node_268: feature_name=GO:0050901	feature_id[175].value <= threshold=1.6129865050315857
node_269: feature_name=GO:0021903	feature_id[211].value <= threshold=0.9824570417404175
node_270: feature_name=GO:0051534	feature_id[945].value <= threshold=0.5949008762836456
node_271: feature_name=GO:1900006	feature_id[697].value <= threshold=0.3523732125759125
node_272: feature_name=GO:0016755	feature_id[874].value <= threshold=0.9256992340087891
node_273: feature_name=GO:0031308	feature_id[875].value <= threshold=1.1520193219184875
node_274: feature_name=GO:0006971	feature_id[358].value <= threshold=1.1031953692436218
node_275: feature_name=GO:0008589	feature_id[722].value <= threshold=3.153539538383484
node_276: feature_name=GO:0016406	feature_id[70].value <= threshold=1.0396768450737
node_277: feature_name=GO:0045263	feature_id[339].value <= threshold=5.477336168289185
node_278: feature_name=GO:0090162	feature_id[0].value <= threshold=1.5517151951789856
node_279: feature_name=GO:0010760	feature_id[718].value > threshold=1.2278234958648682
Class: Other lncRNAs
Rules_58	passed counts:9
node_0: feature_name=GO:0006275	feature_id[261].value <= threshold=0.611920565366745
node_1: feature_name=GO:0090162	feature_id[0].value <= threshold=4.428043030202389e-05
node_2: feature_name=GO:0000188	feature_id[37].value > threshold=0.017420049756765366
node_68: feature_name=GO:0032026	feature_id[7].value <= threshold=0.413987472653389
node_69: feature_name=GO:0009301	feature_id[404].value <= threshold=0.23043984174728394
node_70: feature_name=GO:0030511	feature_id[508].value <= threshold=0.5425670146942139
node_71: feature_name=GO:0051582	feature_id[102].value <= threshold=0.48802419006824493
node_72: feature_name=GO:0002793	feature_id[597].value > threshold=0.07235005870461464
node_102: feature_name=GO:0005845	feature_id[540].value <= threshold=0.25623150169849396
node_103: feature_name=GO:0030202	feature_id[643].value <= threshold=0.23878131806850433
node_104: feature_name=GO:0051861	feature_id[280].value <= threshold=0.5233777463436127
node_105: feature_name=GO:0035335	feature_id[218].value <= threshold=0.7517804801464081
node_106: feature_name=GO:0043006	feature_id[813].value <= threshold=0.752539187669754
node_107: feature_name=GO:0019972	feature_id[165].value > threshold=0.6998243927955627
node_187: feature_name=GO:0008054	feature_id[117].value <= threshold=0.26741042733192444
node_188: feature_name=GO:0045185	feature_id[785].value > threshold=0.20200951397418976
node_190: feature_name=GO:0070011	feature_id[15].value <= threshold=1.6052147150039673
Class: Other lncRNAs
Rules_59	passed counts:8
node_0: feature_name=GO:0006275	feature_id[261].value <= threshold=0.611920565366745
node_1: feature_name=GO:0090162	feature_id[0].value > threshold=4.428043030202389e-05
node_253: feature_name=GO:0071617	feature_id[203].value <= threshold=0.542830616235733
node_254: feature_name=GO:0048934	feature_id[86].value <= threshold=0.6984235048294067
node_255: feature_name=GO:0031492	feature_id[671].value <= threshold=0.22999948263168335
node_256: feature_name=GO:2000052	feature_id[602].value <= threshold=1.058824062347412
node_257: feature_name=GO:0001697	feature_id[173].value > threshold=1.4856967329978943
node_441: feature_name=GO:0001697	feature_id[173].value <= threshold=1.494957149028778
node_442: feature_name=GO:0015810	feature_id[98].value <= threshold=0.6913057863712311
Class: Other lncRNAs
Rules_60	passed counts:8
node_0: feature_name=GO:0006275	feature_id[261].value <= threshold=0.611920565366745
node_1: feature_name=GO:0090162	feature_id[0].value > threshold=4.428043030202389e-05
node_253: feature_name=GO:0071617	feature_id[203].value <= threshold=0.542830616235733
node_254: feature_name=GO:0048934	feature_id[86].value <= threshold=0.6984235048294067
node_255: feature_name=GO:0031492	feature_id[671].value <= threshold=0.22999948263168335
node_256: feature_name=GO:2000052	feature_id[602].value <= threshold=1.058824062347412
node_257: feature_name=GO:0001697	feature_id[173].value <= threshold=1.4856967329978943
node_258: feature_name=GO:2000323	feature_id[91].value <= threshold=0.3833317458629608
node_259: feature_name=GO:0051861	feature_id[280].value <= threshold=0.814757764339447
node_260: feature_name=GO:0090344	feature_id[832].value <= threshold=0.28676562011241913
node_261: feature_name=GO:0003690	feature_id[479].value > threshold=0.00011137216642964631
node_267: feature_name=GO:0016895	feature_id[897].value <= threshold=0.48792417347431183
node_268: feature_name=GO:0050901	feature_id[175].value <= threshold=1.6129865050315857
node_269: feature_name=GO:0021903	feature_id[211].value <= threshold=0.9824570417404175
node_270: feature_name=GO:0051534	feature_id[945].value <= threshold=0.5949008762836456
node_271: feature_name=GO:1900006	feature_id[697].value <= threshold=0.3523732125759125
node_272: feature_name=GO:0016755	feature_id[874].value <= threshold=0.9256992340087891
node_273: feature_name=GO:0031308	feature_id[875].value <= threshold=1.1520193219184875
node_274: feature_name=GO:0006971	feature_id[358].value <= threshold=1.1031953692436218
node_275: feature_name=GO:0008589	feature_id[722].value <= threshold=3.153539538383484
node_276: feature_name=GO:0016406	feature_id[70].value <= threshold=1.0396768450737
node_277: feature_name=GO:0045263	feature_id[339].value <= threshold=5.477336168289185
node_278: feature_name=GO:0090162	feature_id[0].value <= threshold=1.5517151951789856
node_279: feature_name=GO:0010760	feature_id[718].value <= threshold=1.2278234958648682
node_280: feature_name=GO:0035315	feature_id[670].value <= threshold=2.1861218214035034
node_281: feature_name=GO:0048484	feature_id[136].value > threshold=0.9969654381275177
Class: Other lncRNAs
Rules_61	passed counts:8
node_0: feature_name=GO:0006275	feature_id[261].value <= threshold=0.611920565366745
node_1: feature_name=GO:0090162	feature_id[0].value <= threshold=4.428043030202389e-05
node_2: feature_name=GO:0000188	feature_id[37].value > threshold=0.017420049756765366
node_68: feature_name=GO:0032026	feature_id[7].value <= threshold=0.413987472653389
node_69: feature_name=GO:0009301	feature_id[404].value <= threshold=0.23043984174728394
node_70: feature_name=GO:0030511	feature_id[508].value <= threshold=0.5425670146942139
node_71: feature_name=GO:0051582	feature_id[102].value <= threshold=0.48802419006824493
node_72: feature_name=GO:0002793	feature_id[597].value <= threshold=0.07235005870461464
node_73: feature_name=GO:0035315	feature_id[670].value > threshold=0.19600238651037216
node_93: feature_name=GO:0008444	feature_id[738].value <= threshold=0.03862385079264641
node_94: feature_name=GO:0070652	feature_id[347].value > threshold=0.693673312664032
node_96: feature_name=GO:0042733	feature_id[234].value <= threshold=0.043021319434046745
Class: Other lncRNAs
Rules_62	passed counts:8
node_0: feature_name=GO:0006275	feature_id[261].value <= threshold=0.611920565366745
node_1: feature_name=GO:0090162	feature_id[0].value <= threshold=4.428043030202389e-05
node_2: feature_name=GO:0000188	feature_id[37].value <= threshold=0.017420049756765366
node_3: feature_name=GO:0034720	feature_id[532].value <= threshold=0.0011523710563778877
node_4: feature_name=GO:0017182	feature_id[3].value <= threshold=0.0012494438560679555
node_5: feature_name=GO:0000188	feature_id[37].value <= threshold=7.692553481319919e-05
node_6: feature_name=GO:0032976	feature_id[558].value <= threshold=2.501685380935669
node_7: feature_name=GO:0048611	feature_id[174].value <= threshold=2.2866528034210205
node_8: feature_name=GO:0015811	feature_id[96].value <= threshold=2.909415364265442
node_9: feature_name=GO:0072128	feature_id[369].value <= threshold=2.5927542448043823
node_10: feature_name=GO:0034696	feature_id[84].value <= threshold=2.3267431259155273
node_11: feature_name=GO:1902523	feature_id[44].value <= threshold=2.345110058784485
node_12: feature_name=GO:0005720	feature_id[77].value > threshold=2.4013863801956177
node_14: feature_name=GO:0002793	feature_id[597].value <= threshold=1.3001923859119415
Class: Other lncRNAs
Rules_63	passed counts:7
node_0: feature_name=GO:0006275	feature_id[261].value <= threshold=0.611920565366745
node_1: feature_name=GO:0090162	feature_id[0].value > threshold=4.428043030202389e-05
node_253: feature_name=GO:0071617	feature_id[203].value <= threshold=0.542830616235733
node_254: feature_name=GO:0048934	feature_id[86].value <= threshold=0.6984235048294067
node_255: feature_name=GO:0031492	feature_id[671].value <= threshold=0.22999948263168335
node_256: feature_name=GO:2000052	feature_id[602].value <= threshold=1.058824062347412
node_257: feature_name=GO:0001697	feature_id[173].value <= threshold=1.4856967329978943
node_258: feature_name=GO:2000323	feature_id[91].value <= threshold=0.3833317458629608
node_259: feature_name=GO:0051861	feature_id[280].value <= threshold=0.814757764339447
node_260: feature_name=GO:0090344	feature_id[832].value <= threshold=0.28676562011241913
node_261: feature_name=GO:0003690	feature_id[479].value > threshold=0.00011137216642964631
node_267: feature_name=GO:0016895	feature_id[897].value <= threshold=0.48792417347431183
node_268: feature_name=GO:0050901	feature_id[175].value <= threshold=1.6129865050315857
node_269: feature_name=GO:0021903	feature_id[211].value <= threshold=0.9824570417404175
node_270: feature_name=GO:0051534	feature_id[945].value <= threshold=0.5949008762836456
node_271: feature_name=GO:1900006	feature_id[697].value <= threshold=0.3523732125759125
node_272: feature_name=GO:0016755	feature_id[874].value <= threshold=0.9256992340087891
node_273: feature_name=GO:0031308	feature_id[875].value <= threshold=1.1520193219184875
node_274: feature_name=GO:0006971	feature_id[358].value <= threshold=1.1031953692436218
node_275: feature_name=GO:0008589	feature_id[722].value <= threshold=3.153539538383484
node_276: feature_name=GO:0016406	feature_id[70].value <= threshold=1.0396768450737
node_277: feature_name=GO:0045263	feature_id[339].value <= threshold=5.477336168289185
node_278: feature_name=GO:0090162	feature_id[0].value <= threshold=1.5517151951789856
node_279: feature_name=GO:0010760	feature_id[718].value <= threshold=1.2278234958648682
node_280: feature_name=GO:0035315	feature_id[670].value <= threshold=2.1861218214035034
node_281: feature_name=GO:0048484	feature_id[136].value <= threshold=0.9969654381275177
node_282: feature_name=GO:0002832	feature_id[379].value > threshold=1.9397146105766296
Class: Other lncRNAs
Rules_64	passed counts:7
node_0: feature_name=GO:0006275	feature_id[261].value <= threshold=0.611920565366745
node_1: feature_name=GO:0090162	feature_id[0].value > threshold=4.428043030202389e-05
node_253: feature_name=GO:0071617	feature_id[203].value <= threshold=0.542830616235733
node_254: feature_name=GO:0048934	feature_id[86].value <= threshold=0.6984235048294067
node_255: feature_name=GO:0031492	feature_id[671].value <= threshold=0.22999948263168335
node_256: feature_name=GO:2000052	feature_id[602].value <= threshold=1.058824062347412
node_257: feature_name=GO:0001697	feature_id[173].value <= threshold=1.4856967329978943
node_258: feature_name=GO:2000323	feature_id[91].value <= threshold=0.3833317458629608
node_259: feature_name=GO:0051861	feature_id[280].value <= threshold=0.814757764339447
node_260: feature_name=GO:0090344	feature_id[832].value <= threshold=0.28676562011241913
node_261: feature_name=GO:0003690	feature_id[479].value > threshold=0.00011137216642964631
node_267: feature_name=GO:0016895	feature_id[897].value <= threshold=0.48792417347431183
node_268: feature_name=GO:0050901	feature_id[175].value <= threshold=1.6129865050315857
node_269: feature_name=GO:0021903	feature_id[211].value <= threshold=0.9824570417404175
node_270: feature_name=GO:0051534	feature_id[945].value <= threshold=0.5949008762836456
node_271: feature_name=GO:1900006	feature_id[697].value <= threshold=0.3523732125759125
node_272: feature_name=GO:0016755	feature_id[874].value <= threshold=0.9256992340087891
node_273: feature_name=GO:0031308	feature_id[875].value <= threshold=1.1520193219184875
node_274: feature_name=GO:0006971	feature_id[358].value <= threshold=1.1031953692436218
node_275: feature_name=GO:0008589	feature_id[722].value <= threshold=3.153539538383484
node_276: feature_name=GO:0016406	feature_id[70].value <= threshold=1.0396768450737
node_277: feature_name=GO:0045263	feature_id[339].value <= threshold=5.477336168289185
node_278: feature_name=GO:0090162	feature_id[0].value <= threshold=1.5517151951789856
node_279: feature_name=GO:0010760	feature_id[718].value <= threshold=1.2278234958648682
node_280: feature_name=GO:0035315	feature_id[670].value <= threshold=2.1861218214035034
node_281: feature_name=GO:0048484	feature_id[136].value <= threshold=0.9969654381275177
node_282: feature_name=GO:0002832	feature_id[379].value <= threshold=1.9397146105766296
node_283: feature_name=GO:0030202	feature_id[643].value > threshold=1.0854225754737854
Class: Other lncRNAs
Rules_65	passed counts:7
node_0: feature_name=GO:0006275	feature_id[261].value <= threshold=0.611920565366745
node_1: feature_name=GO:0090162	feature_id[0].value <= threshold=4.428043030202389e-05
node_2: feature_name=GO:0000188	feature_id[37].value > threshold=0.017420049756765366
node_68: feature_name=GO:0032026	feature_id[7].value <= threshold=0.413987472653389
node_69: feature_name=GO:0009301	feature_id[404].value <= threshold=0.23043984174728394
node_70: feature_name=GO:0030511	feature_id[508].value <= threshold=0.5425670146942139
node_71: feature_name=GO:0051582	feature_id[102].value <= threshold=0.48802419006824493
node_72: feature_name=GO:0002793	feature_id[597].value > threshold=0.07235005870461464
node_102: feature_name=GO:0005845	feature_id[540].value <= threshold=0.25623150169849396
node_103: feature_name=GO:0030202	feature_id[643].value <= threshold=0.23878131806850433
node_104: feature_name=GO:0051861	feature_id[280].value <= threshold=0.5233777463436127
node_105: feature_name=GO:0035335	feature_id[218].value <= threshold=0.7517804801464081
node_106: feature_name=GO:0043006	feature_id[813].value <= threshold=0.752539187669754
node_107: feature_name=GO:0019972	feature_id[165].value <= threshold=0.6998243927955627
node_108: feature_name=GO:0002832	feature_id[379].value <= threshold=0.8526075184345245
node_109: feature_name=GO:0006359	feature_id[967].value <= threshold=0.5934928953647614
node_110: feature_name=GO:0032328	feature_id[103].value <= threshold=0.7218275368213654
node_111: feature_name=GO:0004610	feature_id[408].value <= threshold=0.5428347587585449
node_112: feature_name=GO:0046101	feature_id[108].value > threshold=0.5079824477434158
Class: Other lncRNAs
Rules_66	passed counts:7
node_0: feature_name=GO:0006275	feature_id[261].value <= threshold=0.611920565366745
node_1: feature_name=GO:0090162	feature_id[0].value <= threshold=4.428043030202389e-05
node_2: feature_name=GO:0000188	feature_id[37].value > threshold=0.017420049756765366
node_68: feature_name=GO:0032026	feature_id[7].value <= threshold=0.413987472653389
node_69: feature_name=GO:0009301	feature_id[404].value <= threshold=0.23043984174728394
node_70: feature_name=GO:0030511	feature_id[508].value <= threshold=0.5425670146942139
node_71: feature_name=GO:0051582	feature_id[102].value <= threshold=0.48802419006824493
node_72: feature_name=GO:0002793	feature_id[597].value > threshold=0.07235005870461464
node_102: feature_name=GO:0005845	feature_id[540].value <= threshold=0.25623150169849396
node_103: feature_name=GO:0030202	feature_id[643].value <= threshold=0.23878131806850433
node_104: feature_name=GO:0051861	feature_id[280].value <= threshold=0.5233777463436127
node_105: feature_name=GO:0035335	feature_id[218].value <= threshold=0.7517804801464081
node_106: feature_name=GO:0043006	feature_id[813].value <= threshold=0.752539187669754
node_107: feature_name=GO:0019972	feature_id[165].value <= threshold=0.6998243927955627
node_108: feature_name=GO:0002832	feature_id[379].value <= threshold=0.8526075184345245
node_109: feature_name=GO:0006359	feature_id[967].value <= threshold=0.5934928953647614
node_110: feature_name=GO:0032328	feature_id[103].value <= threshold=0.7218275368213654
node_111: feature_name=GO:0004610	feature_id[408].value <= threshold=0.5428347587585449
node_112: feature_name=GO:0046101	feature_id[108].value <= threshold=0.5079824477434158
node_113: feature_name=GO:0010571	feature_id[692].value <= threshold=1.073204219341278
node_114: feature_name=GO:0030896	feature_id[857].value <= threshold=0.5694891214370728
node_115: feature_name=GO:0004605	feature_id[116].value <= threshold=0.547336220741272
node_116: feature_name=GO:0035212	feature_id[647].value <= threshold=0.9775899350643158
node_117: feature_name=GO:0002793	feature_id[597].value <= threshold=1.654231309890747
node_118: feature_name=GO:0043849	feature_id[795].value <= threshold=0.5873804688453674
node_119: feature_name=GO:0043220	feature_id[605].value <= threshold=0.8176074028015137
node_120: feature_name=GO:0072560	feature_id[951].value <= threshold=0.7672012448310852
node_121: feature_name=GO:0051389	feature_id[628].value <= threshold=0.9103278517723083
node_122: feature_name=GO:0031492	feature_id[671].value <= threshold=1.1727005243301392
node_123: feature_name=GO:0070011	feature_id[15].value > threshold=0.0001679047054494731
node_127: feature_name=GO:0032015	feature_id[219].value <= threshold=1.0241680145263672
node_128: feature_name=GO:0060156	feature_id[719].value <= threshold=0.9903597831726074
node_129: feature_name=GO:0030322	feature_id[932].value <= threshold=0.8799079656600952
node_130: feature_name=GO:0000015	feature_id[220].value <= threshold=1.2844931483268738
node_131: feature_name=GO:2000052	feature_id[602].value <= threshold=0.7538323402404785
node_132: feature_name=GO:0004603	feature_id[434].value <= threshold=0.7618633508682251
node_133: feature_name=GO:0018025	feature_id[444].value <= threshold=0.5065247416496277
node_134: feature_name=GO:1901799	feature_id[23].value <= threshold=0.9942423105239868
node_135: feature_name=GO:0046373	feature_id[92].value <= threshold=0.7767069935798645
node_136: feature_name=GO:0055105	feature_id[449].value <= threshold=0.747347354888916
node_137: feature_name=GO:0007021	feature_id[268].value <= threshold=0.3425064980983734
node_138: feature_name=GO:0036220	feature_id[396].value <= threshold=0.6415839791297913
node_139: feature_name=GO:0006424	feature_id[494].value <= threshold=0.6668352484703064
node_140: feature_name=GO:0016589	feature_id[588].value <= threshold=0.17319168150424957
node_141: feature_name=GO:0003167	feature_id[712].value <= threshold=0.9169588088989258
node_142: feature_name=GO:1990074	feature_id[784].value <= threshold=0.488713800907135
node_143: feature_name=GO:0016755	feature_id[874].value <= threshold=0.570704996585846
node_144: feature_name=GO:0010571	feature_id[692].value <= threshold=1.0505748391151428
Class: Cancer-related lncRNAs
Rules_67	passed counts:7
node_0: feature_name=GO:0006275	feature_id[261].value <= threshold=0.611920565366745
node_1: feature_name=GO:0090162	feature_id[0].value <= threshold=4.428043030202389e-05
node_2: feature_name=GO:0000188	feature_id[37].value <= threshold=0.017420049756765366
node_3: feature_name=GO:0034720	feature_id[532].value <= threshold=0.0011523710563778877
node_4: feature_name=GO:0017182	feature_id[3].value > threshold=0.0012494438560679555
node_32: feature_name=GO:0048066	feature_id[148].value > threshold=0.0005970586789771914
node_36: feature_name=GO:0002793	feature_id[597].value <= threshold=0.044548606500029564
node_37: feature_name=GO:0035335	feature_id[218].value > threshold=0.025595619808882475
node_43: feature_name=GO:0050560	feature_id[50].value <= threshold=0.869516134262085
Class: Other lncRNAs
Rules_68	passed counts:6
node_0: feature_name=GO:0006275	feature_id[261].value <= threshold=0.611920565366745
node_1: feature_name=GO:0090162	feature_id[0].value > threshold=4.428043030202389e-05
node_253: feature_name=GO:0071617	feature_id[203].value <= threshold=0.542830616235733
node_254: feature_name=GO:0048934	feature_id[86].value <= threshold=0.6984235048294067
node_255: feature_name=GO:0031492	feature_id[671].value <= threshold=0.22999948263168335
node_256: feature_name=GO:2000052	feature_id[602].value <= threshold=1.058824062347412
node_257: feature_name=GO:0001697	feature_id[173].value <= threshold=1.4856967329978943
node_258: feature_name=GO:2000323	feature_id[91].value <= threshold=0.3833317458629608
node_259: feature_name=GO:0051861	feature_id[280].value <= threshold=0.814757764339447
node_260: feature_name=GO:0090344	feature_id[832].value <= threshold=0.28676562011241913
node_261: feature_name=GO:0003690	feature_id[479].value > threshold=0.00011137216642964631
node_267: feature_name=GO:0016895	feature_id[897].value <= threshold=0.48792417347431183
node_268: feature_name=GO:0050901	feature_id[175].value <= threshold=1.6129865050315857
node_269: feature_name=GO:0021903	feature_id[211].value <= threshold=0.9824570417404175
node_270: feature_name=GO:0051534	feature_id[945].value <= threshold=0.5949008762836456
node_271: feature_name=GO:1900006	feature_id[697].value <= threshold=0.3523732125759125
node_272: feature_name=GO:0016755	feature_id[874].value <= threshold=0.9256992340087891
node_273: feature_name=GO:0031308	feature_id[875].value <= threshold=1.1520193219184875
node_274: feature_name=GO:0006971	feature_id[358].value <= threshold=1.1031953692436218
node_275: feature_name=GO:0008589	feature_id[722].value <= threshold=3.153539538383484
node_276: feature_name=GO:0016406	feature_id[70].value <= threshold=1.0396768450737
node_277: feature_name=GO:0045263	feature_id[339].value <= threshold=5.477336168289185
node_278: feature_name=GO:0090162	feature_id[0].value <= threshold=1.5517151951789856
node_279: feature_name=GO:0010760	feature_id[718].value <= threshold=1.2278234958648682
node_280: feature_name=GO:0035315	feature_id[670].value <= threshold=2.1861218214035034
node_281: feature_name=GO:0048484	feature_id[136].value <= threshold=0.9969654381275177
node_282: feature_name=GO:0002832	feature_id[379].value <= threshold=1.9397146105766296
node_283: feature_name=GO:0030202	feature_id[643].value <= threshold=1.0854225754737854
node_284: feature_name=GO:0048066	feature_id[148].value > threshold=0.7586824595928192
Class: Other lncRNAs
Rules_69	passed counts:6
node_0: feature_name=GO:0006275	feature_id[261].value <= threshold=0.611920565366745
node_1: feature_name=GO:0090162	feature_id[0].value > threshold=4.428043030202389e-05
node_253: feature_name=GO:0071617	feature_id[203].value <= threshold=0.542830616235733
node_254: feature_name=GO:0048934	feature_id[86].value <= threshold=0.6984235048294067
node_255: feature_name=GO:0031492	feature_id[671].value <= threshold=0.22999948263168335
node_256: feature_name=GO:2000052	feature_id[602].value <= threshold=1.058824062347412
node_257: feature_name=GO:0001697	feature_id[173].value <= threshold=1.4856967329978943
node_258: feature_name=GO:2000323	feature_id[91].value <= threshold=0.3833317458629608
node_259: feature_name=GO:0051861	feature_id[280].value <= threshold=0.814757764339447
node_260: feature_name=GO:0090344	feature_id[832].value <= threshold=0.28676562011241913
node_261: feature_name=GO:0003690	feature_id[479].value > threshold=0.00011137216642964631
node_267: feature_name=GO:0016895	feature_id[897].value <= threshold=0.48792417347431183
node_268: feature_name=GO:0050901	feature_id[175].value <= threshold=1.6129865050315857
node_269: feature_name=GO:0021903	feature_id[211].value <= threshold=0.9824570417404175
node_270: feature_name=GO:0051534	feature_id[945].value <= threshold=0.5949008762836456
node_271: feature_name=GO:1900006	feature_id[697].value <= threshold=0.3523732125759125
node_272: feature_name=GO:0016755	feature_id[874].value <= threshold=0.9256992340087891
node_273: feature_name=GO:0031308	feature_id[875].value <= threshold=1.1520193219184875
node_274: feature_name=GO:0006971	feature_id[358].value <= threshold=1.1031953692436218
node_275: feature_name=GO:0008589	feature_id[722].value <= threshold=3.153539538383484
node_276: feature_name=GO:0016406	feature_id[70].value <= threshold=1.0396768450737
node_277: feature_name=GO:0045263	feature_id[339].value <= threshold=5.477336168289185
node_278: feature_name=GO:0090162	feature_id[0].value <= threshold=1.5517151951789856
node_279: feature_name=GO:0010760	feature_id[718].value <= threshold=1.2278234958648682
node_280: feature_name=GO:0035315	feature_id[670].value <= threshold=2.1861218214035034
node_281: feature_name=GO:0048484	feature_id[136].value <= threshold=0.9969654381275177
node_282: feature_name=GO:0002832	feature_id[379].value <= threshold=1.9397146105766296
node_283: feature_name=GO:0030202	feature_id[643].value <= threshold=1.0854225754737854
node_284: feature_name=GO:0048066	feature_id[148].value <= threshold=0.7586824595928192
node_285: feature_name=GO:0043951	feature_id[64].value > threshold=0.9003156423568726
Class: Other lncRNAs
Rules_70	passed counts:6
node_0: feature_name=GO:0006275	feature_id[261].value <= threshold=0.611920565366745
node_1: feature_name=GO:0090162	feature_id[0].value > threshold=4.428043030202389e-05
node_253: feature_name=GO:0071617	feature_id[203].value <= threshold=0.542830616235733
node_254: feature_name=GO:0048934	feature_id[86].value <= threshold=0.6984235048294067
node_255: feature_name=GO:0031492	feature_id[671].value <= threshold=0.22999948263168335
node_256: feature_name=GO:2000052	feature_id[602].value <= threshold=1.058824062347412
node_257: feature_name=GO:0001697	feature_id[173].value <= threshold=1.4856967329978943
node_258: feature_name=GO:2000323	feature_id[91].value <= threshold=0.3833317458629608
node_259: feature_name=GO:0051861	feature_id[280].value <= threshold=0.814757764339447
node_260: feature_name=GO:0090344	feature_id[832].value <= threshold=0.28676562011241913
node_261: feature_name=GO:0003690	feature_id[479].value > threshold=0.00011137216642964631
node_267: feature_name=GO:0016895	feature_id[897].value <= threshold=0.48792417347431183
node_268: feature_name=GO:0050901	feature_id[175].value <= threshold=1.6129865050315857
node_269: feature_name=GO:0021903	feature_id[211].value <= threshold=0.9824570417404175
node_270: feature_name=GO:0051534	feature_id[945].value <= threshold=0.5949008762836456
node_271: feature_name=GO:1900006	feature_id[697].value <= threshold=0.3523732125759125
node_272: feature_name=GO:0016755	feature_id[874].value <= threshold=0.9256992340087891
node_273: feature_name=GO:0031308	feature_id[875].value <= threshold=1.1520193219184875
node_274: feature_name=GO:0006971	feature_id[358].value <= threshold=1.1031953692436218
node_275: feature_name=GO:0008589	feature_id[722].value <= threshold=3.153539538383484
node_276: feature_name=GO:0016406	feature_id[70].value <= threshold=1.0396768450737
node_277: feature_name=GO:0045263	feature_id[339].value <= threshold=5.477336168289185
node_278: feature_name=GO:0090162	feature_id[0].value <= threshold=1.5517151951789856
node_279: feature_name=GO:0010760	feature_id[718].value <= threshold=1.2278234958648682
node_280: feature_name=GO:0035315	feature_id[670].value <= threshold=2.1861218214035034
node_281: feature_name=GO:0048484	feature_id[136].value <= threshold=0.9969654381275177
node_282: feature_name=GO:0002832	feature_id[379].value <= threshold=1.9397146105766296
node_283: feature_name=GO:0030202	feature_id[643].value <= threshold=1.0854225754737854
node_284: feature_name=GO:0048066	feature_id[148].value <= threshold=0.7586824595928192
node_285: feature_name=GO:0043951	feature_id[64].value <= threshold=0.9003156423568726
node_286: feature_name=GO:0055023	feature_id[481].value > threshold=1.2396484017372131
Class: Other lncRNAs
Rules_71	passed counts:6
node_0: feature_name=GO:0006275	feature_id[261].value <= threshold=0.611920565366745
node_1: feature_name=GO:0090162	feature_id[0].value <= threshold=4.428043030202389e-05
node_2: feature_name=GO:0000188	feature_id[37].value > threshold=0.017420049756765366
node_68: feature_name=GO:0032026	feature_id[7].value <= threshold=0.413987472653389
node_69: feature_name=GO:0009301	feature_id[404].value <= threshold=0.23043984174728394
node_70: feature_name=GO:0030511	feature_id[508].value <= threshold=0.5425670146942139
node_71: feature_name=GO:0051582	feature_id[102].value <= threshold=0.48802419006824493
node_72: feature_name=GO:0002793	feature_id[597].value > threshold=0.07235005870461464
node_102: feature_name=GO:0005845	feature_id[540].value <= threshold=0.25623150169849396
node_103: feature_name=GO:0030202	feature_id[643].value <= threshold=0.23878131806850433
node_104: feature_name=GO:0051861	feature_id[280].value <= threshold=0.5233777463436127
node_105: feature_name=GO:0035335	feature_id[218].value <= threshold=0.7517804801464081
node_106: feature_name=GO:0043006	feature_id[813].value <= threshold=0.752539187669754
node_107: feature_name=GO:0019972	feature_id[165].value <= threshold=0.6998243927955627
node_108: feature_name=GO:0002832	feature_id[379].value <= threshold=0.8526075184345245
node_109: feature_name=GO:0006359	feature_id[967].value <= threshold=0.5934928953647614
node_110: feature_name=GO:0032328	feature_id[103].value <= threshold=0.7218275368213654
node_111: feature_name=GO:0004610	feature_id[408].value <= threshold=0.5428347587585449
node_112: feature_name=GO:0046101	feature_id[108].value <= threshold=0.5079824477434158
node_113: feature_name=GO:0010571	feature_id[692].value > threshold=1.073204219341278
Class: Other lncRNAs
Rules_72	passed counts:6
node_0: feature_name=GO:0006275	feature_id[261].value <= threshold=0.611920565366745
node_1: feature_name=GO:0090162	feature_id[0].value <= threshold=4.428043030202389e-05
node_2: feature_name=GO:0000188	feature_id[37].value > threshold=0.017420049756765366
node_68: feature_name=GO:0032026	feature_id[7].value <= threshold=0.413987472653389
node_69: feature_name=GO:0009301	feature_id[404].value <= threshold=0.23043984174728394
node_70: feature_name=GO:0030511	feature_id[508].value <= threshold=0.5425670146942139
node_71: feature_name=GO:0051582	feature_id[102].value <= threshold=0.48802419006824493
node_72: feature_name=GO:0002793	feature_id[597].value > threshold=0.07235005870461464
node_102: feature_name=GO:0005845	feature_id[540].value <= threshold=0.25623150169849396
node_103: feature_name=GO:0030202	feature_id[643].value <= threshold=0.23878131806850433
node_104: feature_name=GO:0051861	feature_id[280].value <= threshold=0.5233777463436127
node_105: feature_name=GO:0035335	feature_id[218].value <= threshold=0.7517804801464081
node_106: feature_name=GO:0043006	feature_id[813].value <= threshold=0.752539187669754
node_107: feature_name=GO:0019972	feature_id[165].value <= threshold=0.6998243927955627
node_108: feature_name=GO:0002832	feature_id[379].value <= threshold=0.8526075184345245
node_109: feature_name=GO:0006359	feature_id[967].value <= threshold=0.5934928953647614
node_110: feature_name=GO:0032328	feature_id[103].value <= threshold=0.7218275368213654
node_111: feature_name=GO:0004610	feature_id[408].value <= threshold=0.5428347587585449
node_112: feature_name=GO:0046101	feature_id[108].value <= threshold=0.5079824477434158
node_113: feature_name=GO:0010571	feature_id[692].value <= threshold=1.073204219341278
node_114: feature_name=GO:0030896	feature_id[857].value > threshold=0.5694891214370728
Class: Other lncRNAs
Rules_73	passed counts:6
node_0: feature_name=GO:0006275	feature_id[261].value <= threshold=0.611920565366745
node_1: feature_name=GO:0090162	feature_id[0].value <= threshold=4.428043030202389e-05
node_2: feature_name=GO:0000188	feature_id[37].value > threshold=0.017420049756765366
node_68: feature_name=GO:0032026	feature_id[7].value <= threshold=0.413987472653389
node_69: feature_name=GO:0009301	feature_id[404].value <= threshold=0.23043984174728394
node_70: feature_name=GO:0030511	feature_id[508].value <= threshold=0.5425670146942139
node_71: feature_name=GO:0051582	feature_id[102].value <= threshold=0.48802419006824493
node_72: feature_name=GO:0002793	feature_id[597].value > threshold=0.07235005870461464
node_102: feature_name=GO:0005845	feature_id[540].value <= threshold=0.25623150169849396
node_103: feature_name=GO:0030202	feature_id[643].value <= threshold=0.23878131806850433
node_104: feature_name=GO:0051861	feature_id[280].value <= threshold=0.5233777463436127
node_105: feature_name=GO:0035335	feature_id[218].value <= threshold=0.7517804801464081
node_106: feature_name=GO:0043006	feature_id[813].value <= threshold=0.752539187669754
node_107: feature_name=GO:0019972	feature_id[165].value <= threshold=0.6998243927955627
node_108: feature_name=GO:0002832	feature_id[379].value <= threshold=0.8526075184345245
node_109: feature_name=GO:0006359	feature_id[967].value <= threshold=0.5934928953647614
node_110: feature_name=GO:0032328	feature_id[103].value <= threshold=0.7218275368213654
node_111: feature_name=GO:0004610	feature_id[408].value <= threshold=0.5428347587585449
node_112: feature_name=GO:0046101	feature_id[108].value <= threshold=0.5079824477434158
node_113: feature_name=GO:0010571	feature_id[692].value <= threshold=1.073204219341278
node_114: feature_name=GO:0030896	feature_id[857].value <= threshold=0.5694891214370728
node_115: feature_name=GO:0004605	feature_id[116].value > threshold=0.547336220741272
Class: Other lncRNAs
Rules_74	passed counts:6
node_0: feature_name=GO:0006275	feature_id[261].value <= threshold=0.611920565366745
node_1: feature_name=GO:0090162	feature_id[0].value <= threshold=4.428043030202389e-05
node_2: feature_name=GO:0000188	feature_id[37].value <= threshold=0.017420049756765366
node_3: feature_name=GO:0034720	feature_id[532].value <= threshold=0.0011523710563778877
node_4: feature_name=GO:0017182	feature_id[3].value <= threshold=0.0012494438560679555
node_5: feature_name=GO:0000188	feature_id[37].value <= threshold=7.692553481319919e-05
node_6: feature_name=GO:0032976	feature_id[558].value <= threshold=2.501685380935669
node_7: feature_name=GO:0048611	feature_id[174].value <= threshold=2.2866528034210205
node_8: feature_name=GO:0015811	feature_id[96].value <= threshold=2.909415364265442
node_9: feature_name=GO:0072128	feature_id[369].value <= threshold=2.5927542448043823
node_10: feature_name=GO:0034696	feature_id[84].value <= threshold=2.3267431259155273
node_11: feature_name=GO:1902523	feature_id[44].value > threshold=2.345110058784485
node_17: feature_name=GO:0008589	feature_id[722].value <= threshold=0.8556889891624451
Class: Other lncRNAs
Rules_75	passed counts:5
node_0: feature_name=GO:0006275	feature_id[261].value <= threshold=0.611920565366745
node_1: feature_name=GO:0090162	feature_id[0].value > threshold=4.428043030202389e-05
node_253: feature_name=GO:0071617	feature_id[203].value <= threshold=0.542830616235733
node_254: feature_name=GO:0048934	feature_id[86].value <= threshold=0.6984235048294067
node_255: feature_name=GO:0031492	feature_id[671].value <= threshold=0.22999948263168335
node_256: feature_name=GO:2000052	feature_id[602].value <= threshold=1.058824062347412
node_257: feature_name=GO:0001697	feature_id[173].value <= threshold=1.4856967329978943
node_258: feature_name=GO:2000323	feature_id[91].value <= threshold=0.3833317458629608
node_259: feature_name=GO:0051861	feature_id[280].value <= threshold=0.814757764339447
node_260: feature_name=GO:0090344	feature_id[832].value <= threshold=0.28676562011241913
node_261: feature_name=GO:0003690	feature_id[479].value > threshold=0.00011137216642964631
node_267: feature_name=GO:0016895	feature_id[897].value <= threshold=0.48792417347431183
node_268: feature_name=GO:0050901	feature_id[175].value <= threshold=1.6129865050315857
node_269: feature_name=GO:0021903	feature_id[211].value <= threshold=0.9824570417404175
node_270: feature_name=GO:0051534	feature_id[945].value <= threshold=0.5949008762836456
node_271: feature_name=GO:1900006	feature_id[697].value <= threshold=0.3523732125759125
node_272: feature_name=GO:0016755	feature_id[874].value <= threshold=0.9256992340087891
node_273: feature_name=GO:0031308	feature_id[875].value <= threshold=1.1520193219184875
node_274: feature_name=GO:0006971	feature_id[358].value <= threshold=1.1031953692436218
node_275: feature_name=GO:0008589	feature_id[722].value <= threshold=3.153539538383484
node_276: feature_name=GO:0016406	feature_id[70].value <= threshold=1.0396768450737
node_277: feature_name=GO:0045263	feature_id[339].value <= threshold=5.477336168289185
node_278: feature_name=GO:0090162	feature_id[0].value <= threshold=1.5517151951789856
node_279: feature_name=GO:0010760	feature_id[718].value <= threshold=1.2278234958648682
node_280: feature_name=GO:0035315	feature_id[670].value <= threshold=2.1861218214035034
node_281: feature_name=GO:0048484	feature_id[136].value <= threshold=0.9969654381275177
node_282: feature_name=GO:0002832	feature_id[379].value <= threshold=1.9397146105766296
node_283: feature_name=GO:0030202	feature_id[643].value <= threshold=1.0854225754737854
node_284: feature_name=GO:0048066	feature_id[148].value <= threshold=0.7586824595928192
node_285: feature_name=GO:0043951	feature_id[64].value <= threshold=0.9003156423568726
node_286: feature_name=GO:0055023	feature_id[481].value <= threshold=1.2396484017372131
node_287: feature_name=GO:0030896	feature_id[857].value > threshold=0.5054407715797424
Class: Other lncRNAs
Rules_76	passed counts:5
node_0: feature_name=GO:0006275	feature_id[261].value <= threshold=0.611920565366745
node_1: feature_name=GO:0090162	feature_id[0].value > threshold=4.428043030202389e-05
node_253: feature_name=GO:0071617	feature_id[203].value <= threshold=0.542830616235733
node_254: feature_name=GO:0048934	feature_id[86].value <= threshold=0.6984235048294067
node_255: feature_name=GO:0031492	feature_id[671].value <= threshold=0.22999948263168335
node_256: feature_name=GO:2000052	feature_id[602].value <= threshold=1.058824062347412
node_257: feature_name=GO:0001697	feature_id[173].value <= threshold=1.4856967329978943
node_258: feature_name=GO:2000323	feature_id[91].value <= threshold=0.3833317458629608
node_259: feature_name=GO:0051861	feature_id[280].value <= threshold=0.814757764339447
node_260: feature_name=GO:0090344	feature_id[832].value <= threshold=0.28676562011241913
node_261: feature_name=GO:0003690	feature_id[479].value > threshold=0.00011137216642964631
node_267: feature_name=GO:0016895	feature_id[897].value <= threshold=0.48792417347431183
node_268: feature_name=GO:0050901	feature_id[175].value <= threshold=1.6129865050315857
node_269: feature_name=GO:0021903	feature_id[211].value <= threshold=0.9824570417404175
node_270: feature_name=GO:0051534	feature_id[945].value <= threshold=0.5949008762836456
node_271: feature_name=GO:1900006	feature_id[697].value <= threshold=0.3523732125759125
node_272: feature_name=GO:0016755	feature_id[874].value <= threshold=0.9256992340087891
node_273: feature_name=GO:0031308	feature_id[875].value <= threshold=1.1520193219184875
node_274: feature_name=GO:0006971	feature_id[358].value <= threshold=1.1031953692436218
node_275: feature_name=GO:0008589	feature_id[722].value <= threshold=3.153539538383484
node_276: feature_name=GO:0016406	feature_id[70].value <= threshold=1.0396768450737
node_277: feature_name=GO:0045263	feature_id[339].value <= threshold=5.477336168289185
node_278: feature_name=GO:0090162	feature_id[0].value <= threshold=1.5517151951789856
node_279: feature_name=GO:0010760	feature_id[718].value <= threshold=1.2278234958648682
node_280: feature_name=GO:0035315	feature_id[670].value <= threshold=2.1861218214035034
node_281: feature_name=GO:0048484	feature_id[136].value <= threshold=0.9969654381275177
node_282: feature_name=GO:0002832	feature_id[379].value <= threshold=1.9397146105766296
node_283: feature_name=GO:0030202	feature_id[643].value <= threshold=1.0854225754737854
node_284: feature_name=GO:0048066	feature_id[148].value <= threshold=0.7586824595928192
node_285: feature_name=GO:0043951	feature_id[64].value <= threshold=0.9003156423568726
node_286: feature_name=GO:0055023	feature_id[481].value <= threshold=1.2396484017372131
node_287: feature_name=GO:0030896	feature_id[857].value <= threshold=0.5054407715797424
node_288: feature_name=GO:0019826	feature_id[238].value > threshold=0.6727499663829803
Class: Other lncRNAs
Rules_77	passed counts:5
node_0: feature_name=GO:0006275	feature_id[261].value <= threshold=0.611920565366745
node_1: feature_name=GO:0090162	feature_id[0].value <= threshold=4.428043030202389e-05
node_2: feature_name=GO:0000188	feature_id[37].value > threshold=0.017420049756765366
node_68: feature_name=GO:0032026	feature_id[7].value <= threshold=0.413987472653389
node_69: feature_name=GO:0009301	feature_id[404].value <= threshold=0.23043984174728394
node_70: feature_name=GO:0030511	feature_id[508].value <= threshold=0.5425670146942139
node_71: feature_name=GO:0051582	feature_id[102].value <= threshold=0.48802419006824493
node_72: feature_name=GO:0002793	feature_id[597].value > threshold=0.07235005870461464
node_102: feature_name=GO:0005845	feature_id[540].value <= threshold=0.25623150169849396
node_103: feature_name=GO:0030202	feature_id[643].value <= threshold=0.23878131806850433
node_104: feature_name=GO:0051861	feature_id[280].value <= threshold=0.5233777463436127
node_105: feature_name=GO:0035335	feature_id[218].value <= threshold=0.7517804801464081
node_106: feature_name=GO:0043006	feature_id[813].value <= threshold=0.752539187669754
node_107: feature_name=GO:0019972	feature_id[165].value <= threshold=0.6998243927955627
node_108: feature_name=GO:0002832	feature_id[379].value <= threshold=0.8526075184345245
node_109: feature_name=GO:0006359	feature_id[967].value <= threshold=0.5934928953647614
node_110: feature_name=GO:0032328	feature_id[103].value <= threshold=0.7218275368213654
node_111: feature_name=GO:0004610	feature_id[408].value <= threshold=0.5428347587585449
node_112: feature_name=GO:0046101	feature_id[108].value <= threshold=0.5079824477434158
node_113: feature_name=GO:0010571	feature_id[692].value <= threshold=1.073204219341278
node_114: feature_name=GO:0030896	feature_id[857].value <= threshold=0.5694891214370728
node_115: feature_name=GO:0004605	feature_id[116].value <= threshold=0.547336220741272
node_116: feature_name=GO:0035212	feature_id[647].value > threshold=0.9775899350643158
Class: Other lncRNAs
Rules_78	passed counts:5
node_0: feature_name=GO:0006275	feature_id[261].value <= threshold=0.611920565366745
node_1: feature_name=GO:0090162	feature_id[0].value <= threshold=4.428043030202389e-05
node_2: feature_name=GO:0000188	feature_id[37].value > threshold=0.017420049756765366
node_68: feature_name=GO:0032026	feature_id[7].value <= threshold=0.413987472653389
node_69: feature_name=GO:0009301	feature_id[404].value <= threshold=0.23043984174728394
node_70: feature_name=GO:0030511	feature_id[508].value <= threshold=0.5425670146942139
node_71: feature_name=GO:0051582	feature_id[102].value <= threshold=0.48802419006824493
node_72: feature_name=GO:0002793	feature_id[597].value > threshold=0.07235005870461464
node_102: feature_name=GO:0005845	feature_id[540].value <= threshold=0.25623150169849396
node_103: feature_name=GO:0030202	feature_id[643].value <= threshold=0.23878131806850433
node_104: feature_name=GO:0051861	feature_id[280].value <= threshold=0.5233777463436127
node_105: feature_name=GO:0035335	feature_id[218].value <= threshold=0.7517804801464081
node_106: feature_name=GO:0043006	feature_id[813].value <= threshold=0.752539187669754
node_107: feature_name=GO:0019972	feature_id[165].value <= threshold=0.6998243927955627
node_108: feature_name=GO:0002832	feature_id[379].value <= threshold=0.8526075184345245
node_109: feature_name=GO:0006359	feature_id[967].value <= threshold=0.5934928953647614
node_110: feature_name=GO:0032328	feature_id[103].value <= threshold=0.7218275368213654
node_111: feature_name=GO:0004610	feature_id[408].value <= threshold=0.5428347587585449
node_112: feature_name=GO:0046101	feature_id[108].value <= threshold=0.5079824477434158
node_113: feature_name=GO:0010571	feature_id[692].value <= threshold=1.073204219341278
node_114: feature_name=GO:0030896	feature_id[857].value <= threshold=0.5694891214370728
node_115: feature_name=GO:0004605	feature_id[116].value <= threshold=0.547336220741272
node_116: feature_name=GO:0035212	feature_id[647].value <= threshold=0.9775899350643158
node_117: feature_name=GO:0002793	feature_id[597].value > threshold=1.654231309890747
Class: Other lncRNAs
Rules_79	passed counts:5
node_0: feature_name=GO:0006275	feature_id[261].value <= threshold=0.611920565366745
node_1: feature_name=GO:0090162	feature_id[0].value <= threshold=4.428043030202389e-05
node_2: feature_name=GO:0000188	feature_id[37].value > threshold=0.017420049756765366
node_68: feature_name=GO:0032026	feature_id[7].value <= threshold=0.413987472653389
node_69: feature_name=GO:0009301	feature_id[404].value <= threshold=0.23043984174728394
node_70: feature_name=GO:0030511	feature_id[508].value <= threshold=0.5425670146942139
node_71: feature_name=GO:0051582	feature_id[102].value <= threshold=0.48802419006824493
node_72: feature_name=GO:0002793	feature_id[597].value > threshold=0.07235005870461464
node_102: feature_name=GO:0005845	feature_id[540].value <= threshold=0.25623150169849396
node_103: feature_name=GO:0030202	feature_id[643].value <= threshold=0.23878131806850433
node_104: feature_name=GO:0051861	feature_id[280].value <= threshold=0.5233777463436127
node_105: feature_name=GO:0035335	feature_id[218].value <= threshold=0.7517804801464081
node_106: feature_name=GO:0043006	feature_id[813].value <= threshold=0.752539187669754
node_107: feature_name=GO:0019972	feature_id[165].value <= threshold=0.6998243927955627
node_108: feature_name=GO:0002832	feature_id[379].value <= threshold=0.8526075184345245
node_109: feature_name=GO:0006359	feature_id[967].value <= threshold=0.5934928953647614
node_110: feature_name=GO:0032328	feature_id[103].value <= threshold=0.7218275368213654
node_111: feature_name=GO:0004610	feature_id[408].value <= threshold=0.5428347587585449
node_112: feature_name=GO:0046101	feature_id[108].value <= threshold=0.5079824477434158
node_113: feature_name=GO:0010571	feature_id[692].value <= threshold=1.073204219341278
node_114: feature_name=GO:0030896	feature_id[857].value <= threshold=0.5694891214370728
node_115: feature_name=GO:0004605	feature_id[116].value <= threshold=0.547336220741272
node_116: feature_name=GO:0035212	feature_id[647].value <= threshold=0.9775899350643158
node_117: feature_name=GO:0002793	feature_id[597].value <= threshold=1.654231309890747
node_118: feature_name=GO:0043849	feature_id[795].value > threshold=0.5873804688453674
Class: Other lncRNAs
Rules_80	passed counts:5
node_0: feature_name=GO:0006275	feature_id[261].value <= threshold=0.611920565366745
node_1: feature_name=GO:0090162	feature_id[0].value <= threshold=4.428043030202389e-05
node_2: feature_name=GO:0000188	feature_id[37].value > threshold=0.017420049756765366
node_68: feature_name=GO:0032026	feature_id[7].value <= threshold=0.413987472653389
node_69: feature_name=GO:0009301	feature_id[404].value <= threshold=0.23043984174728394
node_70: feature_name=GO:0030511	feature_id[508].value <= threshold=0.5425670146942139
node_71: feature_name=GO:0051582	feature_id[102].value <= threshold=0.48802419006824493
node_72: feature_name=GO:0002793	feature_id[597].value > threshold=0.07235005870461464
node_102: feature_name=GO:0005845	feature_id[540].value <= threshold=0.25623150169849396
node_103: feature_name=GO:0030202	feature_id[643].value <= threshold=0.23878131806850433
node_104: feature_name=GO:0051861	feature_id[280].value <= threshold=0.5233777463436127
node_105: feature_name=GO:0035335	feature_id[218].value <= threshold=0.7517804801464081
node_106: feature_name=GO:0043006	feature_id[813].value <= threshold=0.752539187669754
node_107: feature_name=GO:0019972	feature_id[165].value <= threshold=0.6998243927955627
node_108: feature_name=GO:0002832	feature_id[379].value <= threshold=0.8526075184345245
node_109: feature_name=GO:0006359	feature_id[967].value <= threshold=0.5934928953647614
node_110: feature_name=GO:0032328	feature_id[103].value <= threshold=0.7218275368213654
node_111: feature_name=GO:0004610	feature_id[408].value <= threshold=0.5428347587585449
node_112: feature_name=GO:0046101	feature_id[108].value <= threshold=0.5079824477434158
node_113: feature_name=GO:0010571	feature_id[692].value <= threshold=1.073204219341278
node_114: feature_name=GO:0030896	feature_id[857].value <= threshold=0.5694891214370728
node_115: feature_name=GO:0004605	feature_id[116].value <= threshold=0.547336220741272
node_116: feature_name=GO:0035212	feature_id[647].value <= threshold=0.9775899350643158
node_117: feature_name=GO:0002793	feature_id[597].value <= threshold=1.654231309890747
node_118: feature_name=GO:0043849	feature_id[795].value <= threshold=0.5873804688453674
node_119: feature_name=GO:0043220	feature_id[605].value > threshold=0.8176074028015137
Class: Other lncRNAs
Rules_81	passed counts:5
node_0: feature_name=GO:0006275	feature_id[261].value <= threshold=0.611920565366745
node_1: feature_name=GO:0090162	feature_id[0].value <= threshold=4.428043030202389e-05
node_2: feature_name=GO:0000188	feature_id[37].value > threshold=0.017420049756765366
node_68: feature_name=GO:0032026	feature_id[7].value <= threshold=0.413987472653389
node_69: feature_name=GO:0009301	feature_id[404].value <= threshold=0.23043984174728394
node_70: feature_name=GO:0030511	feature_id[508].value <= threshold=0.5425670146942139
node_71: feature_name=GO:0051582	feature_id[102].value <= threshold=0.48802419006824493
node_72: feature_name=GO:0002793	feature_id[597].value > threshold=0.07235005870461464
node_102: feature_name=GO:0005845	feature_id[540].value <= threshold=0.25623150169849396
node_103: feature_name=GO:0030202	feature_id[643].value <= threshold=0.23878131806850433
node_104: feature_name=GO:0051861	feature_id[280].value <= threshold=0.5233777463436127
node_105: feature_name=GO:0035335	feature_id[218].value <= threshold=0.7517804801464081
node_106: feature_name=GO:0043006	feature_id[813].value <= threshold=0.752539187669754
node_107: feature_name=GO:0019972	feature_id[165].value <= threshold=0.6998243927955627
node_108: feature_name=GO:0002832	feature_id[379].value <= threshold=0.8526075184345245
node_109: feature_name=GO:0006359	feature_id[967].value <= threshold=0.5934928953647614
node_110: feature_name=GO:0032328	feature_id[103].value <= threshold=0.7218275368213654
node_111: feature_name=GO:0004610	feature_id[408].value <= threshold=0.5428347587585449
node_112: feature_name=GO:0046101	feature_id[108].value <= threshold=0.5079824477434158
node_113: feature_name=GO:0010571	feature_id[692].value <= threshold=1.073204219341278
node_114: feature_name=GO:0030896	feature_id[857].value <= threshold=0.5694891214370728
node_115: feature_name=GO:0004605	feature_id[116].value <= threshold=0.547336220741272
node_116: feature_name=GO:0035212	feature_id[647].value <= threshold=0.9775899350643158
node_117: feature_name=GO:0002793	feature_id[597].value <= threshold=1.654231309890747
node_118: feature_name=GO:0043849	feature_id[795].value <= threshold=0.5873804688453674
node_119: feature_name=GO:0043220	feature_id[605].value <= threshold=0.8176074028015137
node_120: feature_name=GO:0072560	feature_id[951].value <= threshold=0.7672012448310852
node_121: feature_name=GO:0051389	feature_id[628].value <= threshold=0.9103278517723083
node_122: feature_name=GO:0031492	feature_id[671].value <= threshold=1.1727005243301392
node_123: feature_name=GO:0070011	feature_id[15].value > threshold=0.0001679047054494731
node_127: feature_name=GO:0032015	feature_id[219].value > threshold=1.0241680145263672
node_167: feature_name=GO:0046471	feature_id[895].value <= threshold=0.7912333607673645
Class: Other lncRNAs
Rules_82	passed counts:5
node_0: feature_name=GO:0006275	feature_id[261].value <= threshold=0.611920565366745
node_1: feature_name=GO:0090162	feature_id[0].value <= threshold=4.428043030202389e-05
node_2: feature_name=GO:0000188	feature_id[37].value <= threshold=0.017420049756765366
node_3: feature_name=GO:0034720	feature_id[532].value > threshold=0.0011523710563778877
node_47: feature_name=GO:0090150	feature_id[213].value > threshold=0.0008717003074707463
node_51: feature_name=GO:0035335	feature_id[218].value <= threshold=0.136051207780838
node_52: feature_name=GO:0008054	feature_id[117].value <= threshold=0.49912822246551514
node_53: feature_name=GO:0035315	feature_id[670].value > threshold=0.5976162254810333
Class: Other lncRNAs
Rules_83	passed counts:5
node_0: feature_name=GO:0006275	feature_id[261].value <= threshold=0.611920565366745
node_1: feature_name=GO:0090162	feature_id[0].value <= threshold=4.428043030202389e-05
node_2: feature_name=GO:0000188	feature_id[37].value <= threshold=0.017420049756765366
node_3: feature_name=GO:0034720	feature_id[532].value <= threshold=0.0011523710563778877
node_4: feature_name=GO:0017182	feature_id[3].value <= threshold=0.0012494438560679555
node_5: feature_name=GO:0000188	feature_id[37].value <= threshold=7.692553481319919e-05
node_6: feature_name=GO:0032976	feature_id[558].value <= threshold=2.501685380935669
node_7: feature_name=GO:0048611	feature_id[174].value <= threshold=2.2866528034210205
node_8: feature_name=GO:0015811	feature_id[96].value <= threshold=2.909415364265442
node_9: feature_name=GO:0072128	feature_id[369].value <= threshold=2.5927542448043823
node_10: feature_name=GO:0034696	feature_id[84].value > threshold=2.3267431259155273
node_20: feature_name=GO:0070011	feature_id[15].value <= threshold=0.5328046828508377
Class: Other lncRNAs
Rules_84	passed counts:4
node_0: feature_name=GO:0006275	feature_id[261].value > threshold=0.611920565366745
node_462: feature_name=GO:2000642	feature_id[20].value > threshold=0.6624273061752319
node_482: feature_name=GO:0008589	feature_id[722].value > threshold=0.2597865164279938
Class: Other lncRNAs
Rules_85	passed counts:4
node_0: feature_name=GO:0006275	feature_id[261].value > threshold=0.611920565366745
node_462: feature_name=GO:2000642	feature_id[20].value <= threshold=0.6624273061752319
node_463: feature_name=GO:0035105	feature_id[46].value <= threshold=2.0055588483810425
node_464: feature_name=GO:2000299	feature_id[31].value <= threshold=1.0164494514465332
node_465: feature_name=GO:0006275	feature_id[261].value <= threshold=0.6121423840522766
node_466: feature_name=GO:0070011	feature_id[15].value > threshold=1.6098740100860596
node_468: feature_name=GO:0045185	feature_id[785].value <= threshold=0.1677512377500534
Class: Other lncRNAs
Rules_86	passed counts:4
node_0: feature_name=GO:0006275	feature_id[261].value <= threshold=0.611920565366745
node_1: feature_name=GO:0090162	feature_id[0].value > threshold=4.428043030202389e-05
node_253: feature_name=GO:0071617	feature_id[203].value <= threshold=0.542830616235733
node_254: feature_name=GO:0048934	feature_id[86].value <= threshold=0.6984235048294067
node_255: feature_name=GO:0031492	feature_id[671].value <= threshold=0.22999948263168335
node_256: feature_name=GO:2000052	feature_id[602].value <= threshold=1.058824062347412
node_257: feature_name=GO:0001697	feature_id[173].value > threshold=1.4856967329978943
node_441: feature_name=GO:0001697	feature_id[173].value > threshold=1.494957149028778
node_445: feature_name=GO:0002793	feature_id[597].value <= threshold=0.1971605122089386
node_446: feature_name=GO:0051311	feature_id[614].value <= threshold=1.4954149723052979
Class: Other lncRNAs
Rules_87	passed counts:4
node_0: feature_name=GO:0006275	feature_id[261].value <= threshold=0.611920565366745
node_1: feature_name=GO:0090162	feature_id[0].value > threshold=4.428043030202389e-05
node_253: feature_name=GO:0071617	feature_id[203].value <= threshold=0.542830616235733
node_254: feature_name=GO:0048934	feature_id[86].value <= threshold=0.6984235048294067
node_255: feature_name=GO:0031492	feature_id[671].value <= threshold=0.22999948263168335
node_256: feature_name=GO:2000052	feature_id[602].value <= threshold=1.058824062347412
node_257: feature_name=GO:0001697	feature_id[173].value <= threshold=1.4856967329978943
node_258: feature_name=GO:2000323	feature_id[91].value <= threshold=0.3833317458629608
node_259: feature_name=GO:0051861	feature_id[280].value <= threshold=0.814757764339447
node_260: feature_name=GO:0090344	feature_id[832].value <= threshold=0.28676562011241913
node_261: feature_name=GO:0003690	feature_id[479].value > threshold=0.00011137216642964631
node_267: feature_name=GO:0016895	feature_id[897].value <= threshold=0.48792417347431183
node_268: feature_name=GO:0050901	feature_id[175].value <= threshold=1.6129865050315857
node_269: feature_name=GO:0021903	feature_id[211].value <= threshold=0.9824570417404175
node_270: feature_name=GO:0051534	feature_id[945].value <= threshold=0.5949008762836456
node_271: feature_name=GO:1900006	feature_id[697].value <= threshold=0.3523732125759125
node_272: feature_name=GO:0016755	feature_id[874].value <= threshold=0.9256992340087891
node_273: feature_name=GO:0031308	feature_id[875].value <= threshold=1.1520193219184875
node_274: feature_name=GO:0006971	feature_id[358].value > threshold=1.1031953692436218
node_412: feature_name=GO:0021903	feature_id[211].value <= threshold=0.0006785722798667848
node_413: feature_name=GO:0045185	feature_id[785].value <= threshold=0.12683483213186264
node_414: feature_name=GO:0045029	feature_id[382].value <= threshold=1.9412636756896973
Class: Other lncRNAs
Rules_88	passed counts:4
node_0: feature_name=GO:0006275	feature_id[261].value <= threshold=0.611920565366745
node_1: feature_name=GO:0090162	feature_id[0].value > threshold=4.428043030202389e-05
node_253: feature_name=GO:0071617	feature_id[203].value <= threshold=0.542830616235733
node_254: feature_name=GO:0048934	feature_id[86].value <= threshold=0.6984235048294067
node_255: feature_name=GO:0031492	feature_id[671].value <= threshold=0.22999948263168335
node_256: feature_name=GO:2000052	feature_id[602].value <= threshold=1.058824062347412
node_257: feature_name=GO:0001697	feature_id[173].value <= threshold=1.4856967329978943
node_258: feature_name=GO:2000323	feature_id[91].value <= threshold=0.3833317458629608
node_259: feature_name=GO:0051861	feature_id[280].value <= threshold=0.814757764339447
node_260: feature_name=GO:0090344	feature_id[832].value <= threshold=0.28676562011241913
node_261: feature_name=GO:0003690	feature_id[479].value > threshold=0.00011137216642964631
node_267: feature_name=GO:0016895	feature_id[897].value <= threshold=0.48792417347431183
node_268: feature_name=GO:0050901	feature_id[175].value <= threshold=1.6129865050315857
node_269: feature_name=GO:0021903	feature_id[211].value <= threshold=0.9824570417404175
node_270: feature_name=GO:0051534	feature_id[945].value <= threshold=0.5949008762836456
node_271: feature_name=GO:1900006	feature_id[697].value <= threshold=0.3523732125759125
node_272: feature_name=GO:0016755	feature_id[874].value <= threshold=0.9256992340087891
node_273: feature_name=GO:0031308	feature_id[875].value <= threshold=1.1520193219184875
node_274: feature_name=GO:0006971	feature_id[358].value <= threshold=1.1031953692436218
node_275: feature_name=GO:0008589	feature_id[722].value <= threshold=3.153539538383484
node_276: feature_name=GO:0016406	feature_id[70].value <= threshold=1.0396768450737
node_277: feature_name=GO:0045263	feature_id[339].value <= threshold=5.477336168289185
node_278: feature_name=GO:0090162	feature_id[0].value <= threshold=1.5517151951789856
node_279: feature_name=GO:0010760	feature_id[718].value <= threshold=1.2278234958648682
node_280: feature_name=GO:0035315	feature_id[670].value <= threshold=2.1861218214035034
node_281: feature_name=GO:0048484	feature_id[136].value <= threshold=0.9969654381275177
node_282: feature_name=GO:0002832	feature_id[379].value <= threshold=1.9397146105766296
node_283: feature_name=GO:0030202	feature_id[643].value <= threshold=1.0854225754737854
node_284: feature_name=GO:0048066	feature_id[148].value <= threshold=0.7586824595928192
node_285: feature_name=GO:0043951	feature_id[64].value <= threshold=0.9003156423568726
node_286: feature_name=GO:0055023	feature_id[481].value <= threshold=1.2396484017372131
node_287: feature_name=GO:0030896	feature_id[857].value <= threshold=0.5054407715797424
node_288: feature_name=GO:0019826	feature_id[238].value <= threshold=0.6727499663829803
node_289: feature_name=GO:0003140	feature_id[30].value > threshold=1.0574628114700317
Class: Other lncRNAs
Rules_89	passed counts:4
node_0: feature_name=GO:0006275	feature_id[261].value <= threshold=0.611920565366745
node_1: feature_name=GO:0090162	feature_id[0].value > threshold=4.428043030202389e-05
node_253: feature_name=GO:0071617	feature_id[203].value <= threshold=0.542830616235733
node_254: feature_name=GO:0048934	feature_id[86].value <= threshold=0.6984235048294067
node_255: feature_name=GO:0031492	feature_id[671].value <= threshold=0.22999948263168335
node_256: feature_name=GO:2000052	feature_id[602].value <= threshold=1.058824062347412
node_257: feature_name=GO:0001697	feature_id[173].value <= threshold=1.4856967329978943
node_258: feature_name=GO:2000323	feature_id[91].value <= threshold=0.3833317458629608
node_259: feature_name=GO:0051861	feature_id[280].value <= threshold=0.814757764339447
node_260: feature_name=GO:0090344	feature_id[832].value <= threshold=0.28676562011241913
node_261: feature_name=GO:0003690	feature_id[479].value > threshold=0.00011137216642964631
node_267: feature_name=GO:0016895	feature_id[897].value <= threshold=0.48792417347431183
node_268: feature_name=GO:0050901	feature_id[175].value <= threshold=1.6129865050315857
node_269: feature_name=GO:0021903	feature_id[211].value <= threshold=0.9824570417404175
node_270: feature_name=GO:0051534	feature_id[945].value <= threshold=0.5949008762836456
node_271: feature_name=GO:1900006	feature_id[697].value <= threshold=0.3523732125759125
node_272: feature_name=GO:0016755	feature_id[874].value <= threshold=0.9256992340087891
node_273: feature_name=GO:0031308	feature_id[875].value <= threshold=1.1520193219184875
node_274: feature_name=GO:0006971	feature_id[358].value <= threshold=1.1031953692436218
node_275: feature_name=GO:0008589	feature_id[722].value <= threshold=3.153539538383484
node_276: feature_name=GO:0016406	feature_id[70].value <= threshold=1.0396768450737
node_277: feature_name=GO:0045263	feature_id[339].value <= threshold=5.477336168289185
node_278: feature_name=GO:0090162	feature_id[0].value <= threshold=1.5517151951789856
node_279: feature_name=GO:0010760	feature_id[718].value <= threshold=1.2278234958648682
node_280: feature_name=GO:0035315	feature_id[670].value <= threshold=2.1861218214035034
node_281: feature_name=GO:0048484	feature_id[136].value <= threshold=0.9969654381275177
node_282: feature_name=GO:0002832	feature_id[379].value <= threshold=1.9397146105766296
node_283: feature_name=GO:0030202	feature_id[643].value <= threshold=1.0854225754737854
node_284: feature_name=GO:0048066	feature_id[148].value <= threshold=0.7586824595928192
node_285: feature_name=GO:0043951	feature_id[64].value <= threshold=0.9003156423568726
node_286: feature_name=GO:0055023	feature_id[481].value <= threshold=1.2396484017372131
node_287: feature_name=GO:0030896	feature_id[857].value <= threshold=0.5054407715797424
node_288: feature_name=GO:0019826	feature_id[238].value <= threshold=0.6727499663829803
node_289: feature_name=GO:0003140	feature_id[30].value <= threshold=1.0574628114700317
node_290: feature_name=GO:0051595	feature_id[771].value <= threshold=0.5871960520744324
node_291: feature_name=GO:0015811	feature_id[96].value <= threshold=0.5829855799674988
node_292: feature_name=GO:0050916	feature_id[838].value <= threshold=1.2811386585235596
node_293: feature_name=GO:0001179	feature_id[256].value <= threshold=0.76063072681427
node_294: feature_name=GO:0034618	feature_id[141].value <= threshold=0.5537809133529663
node_295: feature_name=GO:0016496	feature_id[82].value <= threshold=2.0457838773727417
node_296: feature_name=GO:0090314	feature_id[80].value <= threshold=1.2334724068641663
node_297: feature_name=GO:0007021	feature_id[268].value <= threshold=0.7400885224342346
node_298: feature_name=GO:0002663	feature_id[180].value <= threshold=0.7435887455940247
node_299: feature_name=GO:0015810	feature_id[98].value <= threshold=1.894443690776825
node_300: feature_name=GO:0045623	feature_id[52].value <= threshold=1.22312331199646
node_301: feature_name=GO:0048352	feature_id[645].value <= threshold=0.5837215781211853
node_302: feature_name=GO:0035921	feature_id[428].value <= threshold=0.9880121946334839
node_303: feature_name=GO:0072423	feature_id[391].value <= threshold=0.9728879034519196
node_304: feature_name=GO:2001200	feature_id[160].value <= threshold=1.018011212348938
node_305: feature_name=GO:1902231	feature_id[569].value <= threshold=1.3365570306777954
node_306: feature_name=GO:0032026	feature_id[7].value <= threshold=0.9187840521335602
node_307: feature_name=GO:2001034	feature_id[331].value <= threshold=1.0831780433654785
node_308: feature_name=GO:0030971	feature_id[14].value <= threshold=1.904356837272644
node_309: feature_name=GO:0071883	feature_id[938].value <= threshold=0.6799247860908508
node_310: feature_name=GO:0042733	feature_id[234].value <= threshold=4.202658176422119
node_311: feature_name=GO:0030362	feature_id[600].value <= threshold=0.6039373278617859
node_312: feature_name=GO:0060046	feature_id[229].value <= threshold=1.433750867843628
node_313: feature_name=GO:0070345	feature_id[62].value <= threshold=1.6908894777297974
node_314: feature_name=GO:0045029	feature_id[382].value <= threshold=1.917034089565277
node_315: feature_name=GO:0010286	feature_id[414].value <= threshold=1.5646074414253235
node_316: feature_name=GO:0005642	feature_id[309].value <= threshold=1.557128667831421
node_317: feature_name=GO:0035805	feature_id[66].value <= threshold=2.02736234664917
node_318: feature_name=GO:0033210	feature_id[469].value <= threshold=1.1157371997833252
node_319: feature_name=GO:0030618	feature_id[199].value <= threshold=1.1778436303138733
node_320: feature_name=GO:0072423	feature_id[391].value <= threshold=0.5471353530883789
node_321: feature_name=GO:0070652	feature_id[347].value <= threshold=1.1183950901031494
node_322: feature_name=GO:0015809	feature_id[389].value > threshold=1.15833181142807
node_340: feature_name=GO:0006275	feature_id[261].value <= threshold=0.07836979627609253
Class: Other lncRNAs
Rules_90	passed counts:4
node_0: feature_name=GO:0006275	feature_id[261].value <= threshold=0.611920565366745
node_1: feature_name=GO:0090162	feature_id[0].value > threshold=4.428043030202389e-05
node_253: feature_name=GO:0071617	feature_id[203].value <= threshold=0.542830616235733
node_254: feature_name=GO:0048934	feature_id[86].value <= threshold=0.6984235048294067
node_255: feature_name=GO:0031492	feature_id[671].value <= threshold=0.22999948263168335
node_256: feature_name=GO:2000052	feature_id[602].value <= threshold=1.058824062347412
node_257: feature_name=GO:0001697	feature_id[173].value <= threshold=1.4856967329978943
node_258: feature_name=GO:2000323	feature_id[91].value <= threshold=0.3833317458629608
node_259: feature_name=GO:0051861	feature_id[280].value <= threshold=0.814757764339447
node_260: feature_name=GO:0090344	feature_id[832].value <= threshold=0.28676562011241913
node_261: feature_name=GO:0003690	feature_id[479].value > threshold=0.00011137216642964631
node_267: feature_name=GO:0016895	feature_id[897].value <= threshold=0.48792417347431183
node_268: feature_name=GO:0050901	feature_id[175].value <= threshold=1.6129865050315857
node_269: feature_name=GO:0021903	feature_id[211].value <= threshold=0.9824570417404175
node_270: feature_name=GO:0051534	feature_id[945].value <= threshold=0.5949008762836456
node_271: feature_name=GO:1900006	feature_id[697].value <= threshold=0.3523732125759125
node_272: feature_name=GO:0016755	feature_id[874].value <= threshold=0.9256992340087891
node_273: feature_name=GO:0031308	feature_id[875].value <= threshold=1.1520193219184875
node_274: feature_name=GO:0006971	feature_id[358].value <= threshold=1.1031953692436218
node_275: feature_name=GO:0008589	feature_id[722].value <= threshold=3.153539538383484
node_276: feature_name=GO:0016406	feature_id[70].value <= threshold=1.0396768450737
node_277: feature_name=GO:0045263	feature_id[339].value <= threshold=5.477336168289185
node_278: feature_name=GO:0090162	feature_id[0].value <= threshold=1.5517151951789856
node_279: feature_name=GO:0010760	feature_id[718].value <= threshold=1.2278234958648682
node_280: feature_name=GO:0035315	feature_id[670].value <= threshold=2.1861218214035034
node_281: feature_name=GO:0048484	feature_id[136].value <= threshold=0.9969654381275177
node_282: feature_name=GO:0002832	feature_id[379].value <= threshold=1.9397146105766296
node_283: feature_name=GO:0030202	feature_id[643].value <= threshold=1.0854225754737854
node_284: feature_name=GO:0048066	feature_id[148].value <= threshold=0.7586824595928192
node_285: feature_name=GO:0043951	feature_id[64].value <= threshold=0.9003156423568726
node_286: feature_name=GO:0055023	feature_id[481].value <= threshold=1.2396484017372131
node_287: feature_name=GO:0030896	feature_id[857].value <= threshold=0.5054407715797424
node_288: feature_name=GO:0019826	feature_id[238].value <= threshold=0.6727499663829803
node_289: feature_name=GO:0003140	feature_id[30].value <= threshold=1.0574628114700317
node_290: feature_name=GO:0051595	feature_id[771].value <= threshold=0.5871960520744324
node_291: feature_name=GO:0015811	feature_id[96].value <= threshold=0.5829855799674988
node_292: feature_name=GO:0050916	feature_id[838].value <= threshold=1.2811386585235596
node_293: feature_name=GO:0001179	feature_id[256].value <= threshold=0.76063072681427
node_294: feature_name=GO:0034618	feature_id[141].value <= threshold=0.5537809133529663
node_295: feature_name=GO:0016496	feature_id[82].value <= threshold=2.0457838773727417
node_296: feature_name=GO:0090314	feature_id[80].value <= threshold=1.2334724068641663
node_297: feature_name=GO:0007021	feature_id[268].value <= threshold=0.7400885224342346
node_298: feature_name=GO:0002663	feature_id[180].value <= threshold=0.7435887455940247
node_299: feature_name=GO:0015810	feature_id[98].value <= threshold=1.894443690776825
node_300: feature_name=GO:0045623	feature_id[52].value <= threshold=1.22312331199646
node_301: feature_name=GO:0048352	feature_id[645].value <= threshold=0.5837215781211853
node_302: feature_name=GO:0035921	feature_id[428].value <= threshold=0.9880121946334839
node_303: feature_name=GO:0072423	feature_id[391].value <= threshold=0.9728879034519196
node_304: feature_name=GO:2001200	feature_id[160].value <= threshold=1.018011212348938
node_305: feature_name=GO:1902231	feature_id[569].value <= threshold=1.3365570306777954
node_306: feature_name=GO:0032026	feature_id[7].value <= threshold=0.9187840521335602
node_307: feature_name=GO:2001034	feature_id[331].value <= threshold=1.0831780433654785
node_308: feature_name=GO:0030971	feature_id[14].value <= threshold=1.904356837272644
node_309: feature_name=GO:0071883	feature_id[938].value <= threshold=0.6799247860908508
node_310: feature_name=GO:0042733	feature_id[234].value <= threshold=4.202658176422119
node_311: feature_name=GO:0030362	feature_id[600].value <= threshold=0.6039373278617859
node_312: feature_name=GO:0060046	feature_id[229].value <= threshold=1.433750867843628
node_313: feature_name=GO:0070345	feature_id[62].value <= threshold=1.6908894777297974
node_314: feature_name=GO:0045029	feature_id[382].value <= threshold=1.917034089565277
node_315: feature_name=GO:0010286	feature_id[414].value <= threshold=1.5646074414253235
node_316: feature_name=GO:0005642	feature_id[309].value <= threshold=1.557128667831421
node_317: feature_name=GO:0035805	feature_id[66].value <= threshold=2.02736234664917
node_318: feature_name=GO:0033210	feature_id[469].value <= threshold=1.1157371997833252
node_319: feature_name=GO:0030618	feature_id[199].value <= threshold=1.1778436303138733
node_320: feature_name=GO:0072423	feature_id[391].value <= threshold=0.5471353530883789
node_321: feature_name=GO:0070652	feature_id[347].value <= threshold=1.1183950901031494
node_322: feature_name=GO:0015809	feature_id[389].value <= threshold=1.15833181142807
node_323: feature_name=GO:0009975	feature_id[63].value <= threshold=0.8565109372138977
node_324: feature_name=GO:0018262	feature_id[906].value <= threshold=1.8119945526123047
node_325: feature_name=GO:0021903	feature_id[211].value <= threshold=0.9477379024028778
Class: Cancer-related lncRNAs
Rules_91	passed counts:4
node_0: feature_name=GO:0006275	feature_id[261].value <= threshold=0.611920565366745
node_1: feature_name=GO:0090162	feature_id[0].value <= threshold=4.428043030202389e-05
node_2: feature_name=GO:0000188	feature_id[37].value > threshold=0.017420049756765366
node_68: feature_name=GO:0032026	feature_id[7].value > threshold=0.413987472653389
node_222: feature_name=GO:0050124	feature_id[476].value <= threshold=0.0037437553983181715
node_223: feature_name=GO:0044795	feature_id[915].value <= threshold=0.4820440113544464
node_224: feature_name=GO:0004961	feature_id[259].value > threshold=0.0033755330368876457
node_244: feature_name=GO:0060345	feature_id[241].value <= threshold=0.0033755330368876457
Class: Other lncRNAs
Rules_92	passed counts:4
node_0: feature_name=GO:0006275	feature_id[261].value <= threshold=0.611920565366745
node_1: feature_name=GO:0090162	feature_id[0].value <= threshold=4.428043030202389e-05
node_2: feature_name=GO:0000188	feature_id[37].value > threshold=0.017420049756765366
node_68: feature_name=GO:0032026	feature_id[7].value <= threshold=0.413987472653389
node_69: feature_name=GO:0009301	feature_id[404].value > threshold=0.23043984174728394
node_209: feature_name=GO:0035253	feature_id[54].value > threshold=0.7398464977741241
node_217: feature_name=GO:0042438	feature_id[587].value > threshold=0.7921205461025238
node_219: feature_name=GO:0051105	feature_id[89].value <= threshold=1.051137626171112
Class: Other lncRNAs
Rules_93	passed counts:4
node_0: feature_name=GO:0006275	feature_id[261].value <= threshold=0.611920565366745
node_1: feature_name=GO:0090162	feature_id[0].value <= threshold=4.428043030202389e-05
node_2: feature_name=GO:0000188	feature_id[37].value > threshold=0.017420049756765366
node_68: feature_name=GO:0032026	feature_id[7].value <= threshold=0.413987472653389
node_69: feature_name=GO:0009301	feature_id[404].value <= threshold=0.23043984174728394
node_70: feature_name=GO:0030511	feature_id[508].value <= threshold=0.5425670146942139
node_71: feature_name=GO:0051582	feature_id[102].value <= threshold=0.48802419006824493
node_72: feature_name=GO:0002793	feature_id[597].value > threshold=0.07235005870461464
node_102: feature_name=GO:0005845	feature_id[540].value <= threshold=0.25623150169849396
node_103: feature_name=GO:0030202	feature_id[643].value <= threshold=0.23878131806850433
node_104: feature_name=GO:0051861	feature_id[280].value <= threshold=0.5233777463436127
node_105: feature_name=GO:0035335	feature_id[218].value <= threshold=0.7517804801464081
node_106: feature_name=GO:0043006	feature_id[813].value <= threshold=0.752539187669754
node_107: feature_name=GO:0019972	feature_id[165].value > threshold=0.6998243927955627
node_187: feature_name=GO:0008054	feature_id[117].value <= threshold=0.26741042733192444
node_188: feature_name=GO:0045185	feature_id[785].value > threshold=0.20200951397418976
node_190: feature_name=GO:0070011	feature_id[15].value > threshold=1.6052147150039673
node_192: feature_name=GO:0090344	feature_id[832].value <= threshold=0.3204812705516815
Class: Other lncRNAs
Rules_94	passed counts:4
node_0: feature_name=GO:0006275	feature_id[261].value <= threshold=0.611920565366745
node_1: feature_name=GO:0090162	feature_id[0].value <= threshold=4.428043030202389e-05
node_2: feature_name=GO:0000188	feature_id[37].value > threshold=0.017420049756765366
node_68: feature_name=GO:0032026	feature_id[7].value <= threshold=0.413987472653389
node_69: feature_name=GO:0009301	feature_id[404].value <= threshold=0.23043984174728394
node_70: feature_name=GO:0030511	feature_id[508].value <= threshold=0.5425670146942139
node_71: feature_name=GO:0051582	feature_id[102].value <= threshold=0.48802419006824493
node_72: feature_name=GO:0002793	feature_id[597].value > threshold=0.07235005870461464
node_102: feature_name=GO:0005845	feature_id[540].value <= threshold=0.25623150169849396
node_103: feature_name=GO:0030202	feature_id[643].value <= threshold=0.23878131806850433
node_104: feature_name=GO:0051861	feature_id[280].value <= threshold=0.5233777463436127
node_105: feature_name=GO:0035335	feature_id[218].value <= threshold=0.7517804801464081
node_106: feature_name=GO:0043006	feature_id[813].value <= threshold=0.752539187669754
node_107: feature_name=GO:0019972	feature_id[165].value <= threshold=0.6998243927955627
node_108: feature_name=GO:0002832	feature_id[379].value <= threshold=0.8526075184345245
node_109: feature_name=GO:0006359	feature_id[967].value <= threshold=0.5934928953647614
node_110: feature_name=GO:0032328	feature_id[103].value <= threshold=0.7218275368213654
node_111: feature_name=GO:0004610	feature_id[408].value <= threshold=0.5428347587585449
node_112: feature_name=GO:0046101	feature_id[108].value <= threshold=0.5079824477434158
node_113: feature_name=GO:0010571	feature_id[692].value <= threshold=1.073204219341278
node_114: feature_name=GO:0030896	feature_id[857].value <= threshold=0.5694891214370728
node_115: feature_name=GO:0004605	feature_id[116].value <= threshold=0.547336220741272
node_116: feature_name=GO:0035212	feature_id[647].value <= threshold=0.9775899350643158
node_117: feature_name=GO:0002793	feature_id[597].value <= threshold=1.654231309890747
node_118: feature_name=GO:0043849	feature_id[795].value <= threshold=0.5873804688453674
node_119: feature_name=GO:0043220	feature_id[605].value <= threshold=0.8176074028015137
node_120: feature_name=GO:0072560	feature_id[951].value > threshold=0.7672012448310852
Class: Other lncRNAs
Rules_95	passed counts:4
node_0: feature_name=GO:0006275	feature_id[261].value <= threshold=0.611920565366745
node_1: feature_name=GO:0090162	feature_id[0].value <= threshold=4.428043030202389e-05
node_2: feature_name=GO:0000188	feature_id[37].value > threshold=0.017420049756765366
node_68: feature_name=GO:0032026	feature_id[7].value <= threshold=0.413987472653389
node_69: feature_name=GO:0009301	feature_id[404].value <= threshold=0.23043984174728394
node_70: feature_name=GO:0030511	feature_id[508].value <= threshold=0.5425670146942139
node_71: feature_name=GO:0051582	feature_id[102].value <= threshold=0.48802419006824493
node_72: feature_name=GO:0002793	feature_id[597].value > threshold=0.07235005870461464
node_102: feature_name=GO:0005845	feature_id[540].value <= threshold=0.25623150169849396
node_103: feature_name=GO:0030202	feature_id[643].value <= threshold=0.23878131806850433
node_104: feature_name=GO:0051861	feature_id[280].value <= threshold=0.5233777463436127
node_105: feature_name=GO:0035335	feature_id[218].value <= threshold=0.7517804801464081
node_106: feature_name=GO:0043006	feature_id[813].value <= threshold=0.752539187669754
node_107: feature_name=GO:0019972	feature_id[165].value <= threshold=0.6998243927955627
node_108: feature_name=GO:0002832	feature_id[379].value <= threshold=0.8526075184345245
node_109: feature_name=GO:0006359	feature_id[967].value <= threshold=0.5934928953647614
node_110: feature_name=GO:0032328	feature_id[103].value <= threshold=0.7218275368213654
node_111: feature_name=GO:0004610	feature_id[408].value <= threshold=0.5428347587585449
node_112: feature_name=GO:0046101	feature_id[108].value <= threshold=0.5079824477434158
node_113: feature_name=GO:0010571	feature_id[692].value <= threshold=1.073204219341278
node_114: feature_name=GO:0030896	feature_id[857].value <= threshold=0.5694891214370728
node_115: feature_name=GO:0004605	feature_id[116].value <= threshold=0.547336220741272
node_116: feature_name=GO:0035212	feature_id[647].value <= threshold=0.9775899350643158
node_117: feature_name=GO:0002793	feature_id[597].value <= threshold=1.654231309890747
node_118: feature_name=GO:0043849	feature_id[795].value <= threshold=0.5873804688453674
node_119: feature_name=GO:0043220	feature_id[605].value <= threshold=0.8176074028015137
node_120: feature_name=GO:0072560	feature_id[951].value <= threshold=0.7672012448310852
node_121: feature_name=GO:0051389	feature_id[628].value > threshold=0.9103278517723083
Class: Other lncRNAs
Rules_96	passed counts:4
node_0: feature_name=GO:0006275	feature_id[261].value <= threshold=0.611920565366745
node_1: feature_name=GO:0090162	feature_id[0].value <= threshold=4.428043030202389e-05
node_2: feature_name=GO:0000188	feature_id[37].value > threshold=0.017420049756765366
node_68: feature_name=GO:0032026	feature_id[7].value <= threshold=0.413987472653389
node_69: feature_name=GO:0009301	feature_id[404].value <= threshold=0.23043984174728394
node_70: feature_name=GO:0030511	feature_id[508].value <= threshold=0.5425670146942139
node_71: feature_name=GO:0051582	feature_id[102].value <= threshold=0.48802419006824493
node_72: feature_name=GO:0002793	feature_id[597].value > threshold=0.07235005870461464
node_102: feature_name=GO:0005845	feature_id[540].value <= threshold=0.25623150169849396
node_103: feature_name=GO:0030202	feature_id[643].value <= threshold=0.23878131806850433
node_104: feature_name=GO:0051861	feature_id[280].value <= threshold=0.5233777463436127
node_105: feature_name=GO:0035335	feature_id[218].value <= threshold=0.7517804801464081
node_106: feature_name=GO:0043006	feature_id[813].value <= threshold=0.752539187669754
node_107: feature_name=GO:0019972	feature_id[165].value <= threshold=0.6998243927955627
node_108: feature_name=GO:0002832	feature_id[379].value <= threshold=0.8526075184345245
node_109: feature_name=GO:0006359	feature_id[967].value <= threshold=0.5934928953647614
node_110: feature_name=GO:0032328	feature_id[103].value <= threshold=0.7218275368213654
node_111: feature_name=GO:0004610	feature_id[408].value <= threshold=0.5428347587585449
node_112: feature_name=GO:0046101	feature_id[108].value <= threshold=0.5079824477434158
node_113: feature_name=GO:0010571	feature_id[692].value <= threshold=1.073204219341278
node_114: feature_name=GO:0030896	feature_id[857].value <= threshold=0.5694891214370728
node_115: feature_name=GO:0004605	feature_id[116].value <= threshold=0.547336220741272
node_116: feature_name=GO:0035212	feature_id[647].value <= threshold=0.9775899350643158
node_117: feature_name=GO:0002793	feature_id[597].value <= threshold=1.654231309890747
node_118: feature_name=GO:0043849	feature_id[795].value <= threshold=0.5873804688453674
node_119: feature_name=GO:0043220	feature_id[605].value <= threshold=0.8176074028015137
node_120: feature_name=GO:0072560	feature_id[951].value <= threshold=0.7672012448310852
node_121: feature_name=GO:0051389	feature_id[628].value <= threshold=0.9103278517723083
node_122: feature_name=GO:0031492	feature_id[671].value > threshold=1.1727005243301392
Class: Other lncRNAs
Rules_97	passed counts:4
node_0: feature_name=GO:0006275	feature_id[261].value <= threshold=0.611920565366745
node_1: feature_name=GO:0090162	feature_id[0].value <= threshold=4.428043030202389e-05
node_2: feature_name=GO:0000188	feature_id[37].value > threshold=0.017420049756765366
node_68: feature_name=GO:0032026	feature_id[7].value <= threshold=0.413987472653389
node_69: feature_name=GO:0009301	feature_id[404].value <= threshold=0.23043984174728394
node_70: feature_name=GO:0030511	feature_id[508].value <= threshold=0.5425670146942139
node_71: feature_name=GO:0051582	feature_id[102].value <= threshold=0.48802419006824493
node_72: feature_name=GO:0002793	feature_id[597].value > threshold=0.07235005870461464
node_102: feature_name=GO:0005845	feature_id[540].value <= threshold=0.25623150169849396
node_103: feature_name=GO:0030202	feature_id[643].value <= threshold=0.23878131806850433
node_104: feature_name=GO:0051861	feature_id[280].value <= threshold=0.5233777463436127
node_105: feature_name=GO:0035335	feature_id[218].value <= threshold=0.7517804801464081
node_106: feature_name=GO:0043006	feature_id[813].value <= threshold=0.752539187669754
node_107: feature_name=GO:0019972	feature_id[165].value <= threshold=0.6998243927955627
node_108: feature_name=GO:0002832	feature_id[379].value <= threshold=0.8526075184345245
node_109: feature_name=GO:0006359	feature_id[967].value <= threshold=0.5934928953647614
node_110: feature_name=GO:0032328	feature_id[103].value <= threshold=0.7218275368213654
node_111: feature_name=GO:0004610	feature_id[408].value <= threshold=0.5428347587585449
node_112: feature_name=GO:0046101	feature_id[108].value <= threshold=0.5079824477434158
node_113: feature_name=GO:0010571	feature_id[692].value <= threshold=1.073204219341278
node_114: feature_name=GO:0030896	feature_id[857].value <= threshold=0.5694891214370728
node_115: feature_name=GO:0004605	feature_id[116].value <= threshold=0.547336220741272
node_116: feature_name=GO:0035212	feature_id[647].value <= threshold=0.9775899350643158
node_117: feature_name=GO:0002793	feature_id[597].value <= threshold=1.654231309890747
node_118: feature_name=GO:0043849	feature_id[795].value <= threshold=0.5873804688453674
node_119: feature_name=GO:0043220	feature_id[605].value <= threshold=0.8176074028015137
node_120: feature_name=GO:0072560	feature_id[951].value <= threshold=0.7672012448310852
node_121: feature_name=GO:0051389	feature_id[628].value <= threshold=0.9103278517723083
node_122: feature_name=GO:0031492	feature_id[671].value <= threshold=1.1727005243301392
node_123: feature_name=GO:0070011	feature_id[15].value <= threshold=0.0001679047054494731
node_124: feature_name=GO:0015012	feature_id[371].value <= threshold=0.6047684401273727
Class: Other lncRNAs
Rules_98	passed counts:3
node_0: feature_name=GO:0006275	feature_id[261].value <= threshold=0.611920565366745
node_1: feature_name=GO:0090162	feature_id[0].value > threshold=4.428043030202389e-05
node_253: feature_name=GO:0071617	feature_id[203].value <= threshold=0.542830616235733
node_254: feature_name=GO:0048934	feature_id[86].value <= threshold=0.6984235048294067
node_255: feature_name=GO:0031492	feature_id[671].value <= threshold=0.22999948263168335
node_256: feature_name=GO:2000052	feature_id[602].value <= threshold=1.058824062347412
node_257: feature_name=GO:0001697	feature_id[173].value <= threshold=1.4856967329978943
node_258: feature_name=GO:2000323	feature_id[91].value <= threshold=0.3833317458629608
node_259: feature_name=GO:0051861	feature_id[280].value <= threshold=0.814757764339447
node_260: feature_name=GO:0090344	feature_id[832].value <= threshold=0.28676562011241913
node_261: feature_name=GO:0003690	feature_id[479].value > threshold=0.00011137216642964631
node_267: feature_name=GO:0016895	feature_id[897].value <= threshold=0.48792417347431183
node_268: feature_name=GO:0050901	feature_id[175].value <= threshold=1.6129865050315857
node_269: feature_name=GO:0021903	feature_id[211].value <= threshold=0.9824570417404175
node_270: feature_name=GO:0051534	feature_id[945].value <= threshold=0.5949008762836456
node_271: feature_name=GO:1900006	feature_id[697].value <= threshold=0.3523732125759125
node_272: feature_name=GO:0016755	feature_id[874].value <= threshold=0.9256992340087891
node_273: feature_name=GO:0031308	feature_id[875].value <= threshold=1.1520193219184875
node_274: feature_name=GO:0006971	feature_id[358].value <= threshold=1.1031953692436218
node_275: feature_name=GO:0008589	feature_id[722].value <= threshold=3.153539538383484
node_276: feature_name=GO:0016406	feature_id[70].value <= threshold=1.0396768450737
node_277: feature_name=GO:0045263	feature_id[339].value <= threshold=5.477336168289185
node_278: feature_name=GO:0090162	feature_id[0].value <= threshold=1.5517151951789856
node_279: feature_name=GO:0010760	feature_id[718].value <= threshold=1.2278234958648682
node_280: feature_name=GO:0035315	feature_id[670].value <= threshold=2.1861218214035034
node_281: feature_name=GO:0048484	feature_id[136].value <= threshold=0.9969654381275177
node_282: feature_name=GO:0002832	feature_id[379].value <= threshold=1.9397146105766296
node_283: feature_name=GO:0030202	feature_id[643].value <= threshold=1.0854225754737854
node_284: feature_name=GO:0048066	feature_id[148].value <= threshold=0.7586824595928192
node_285: feature_name=GO:0043951	feature_id[64].value <= threshold=0.9003156423568726
node_286: feature_name=GO:0055023	feature_id[481].value <= threshold=1.2396484017372131
node_287: feature_name=GO:0030896	feature_id[857].value <= threshold=0.5054407715797424
node_288: feature_name=GO:0019826	feature_id[238].value <= threshold=0.6727499663829803
node_289: feature_name=GO:0003140	feature_id[30].value <= threshold=1.0574628114700317
node_290: feature_name=GO:0051595	feature_id[771].value > threshold=0.5871960520744324
Class: Other lncRNAs
Rules_99	passed counts:3
node_0: feature_name=GO:0006275	feature_id[261].value <= threshold=0.611920565366745
node_1: feature_name=GO:0090162	feature_id[0].value > threshold=4.428043030202389e-05
node_253: feature_name=GO:0071617	feature_id[203].value <= threshold=0.542830616235733
node_254: feature_name=GO:0048934	feature_id[86].value <= threshold=0.6984235048294067
node_255: feature_name=GO:0031492	feature_id[671].value <= threshold=0.22999948263168335
node_256: feature_name=GO:2000052	feature_id[602].value <= threshold=1.058824062347412
node_257: feature_name=GO:0001697	feature_id[173].value <= threshold=1.4856967329978943
node_258: feature_name=GO:2000323	feature_id[91].value <= threshold=0.3833317458629608
node_259: feature_name=GO:0051861	feature_id[280].value <= threshold=0.814757764339447
node_260: feature_name=GO:0090344	feature_id[832].value <= threshold=0.28676562011241913
node_261: feature_name=GO:0003690	feature_id[479].value > threshold=0.00011137216642964631
node_267: feature_name=GO:0016895	feature_id[897].value <= threshold=0.48792417347431183
node_268: feature_name=GO:0050901	feature_id[175].value <= threshold=1.6129865050315857
node_269: feature_name=GO:0021903	feature_id[211].value <= threshold=0.9824570417404175
node_270: feature_name=GO:0051534	feature_id[945].value <= threshold=0.5949008762836456
node_271: feature_name=GO:1900006	feature_id[697].value <= threshold=0.3523732125759125
node_272: feature_name=GO:0016755	feature_id[874].value <= threshold=0.9256992340087891
node_273: feature_name=GO:0031308	feature_id[875].value <= threshold=1.1520193219184875
node_274: feature_name=GO:0006971	feature_id[358].value <= threshold=1.1031953692436218
node_275: feature_name=GO:0008589	feature_id[722].value <= threshold=3.153539538383484
node_276: feature_name=GO:0016406	feature_id[70].value <= threshold=1.0396768450737
node_277: feature_name=GO:0045263	feature_id[339].value <= threshold=5.477336168289185
node_278: feature_name=GO:0090162	feature_id[0].value <= threshold=1.5517151951789856
node_279: feature_name=GO:0010760	feature_id[718].value <= threshold=1.2278234958648682
node_280: feature_name=GO:0035315	feature_id[670].value <= threshold=2.1861218214035034
node_281: feature_name=GO:0048484	feature_id[136].value <= threshold=0.9969654381275177
node_282: feature_name=GO:0002832	feature_id[379].value <= threshold=1.9397146105766296
node_283: feature_name=GO:0030202	feature_id[643].value <= threshold=1.0854225754737854
node_284: feature_name=GO:0048066	feature_id[148].value <= threshold=0.7586824595928192
node_285: feature_name=GO:0043951	feature_id[64].value <= threshold=0.9003156423568726
node_286: feature_name=GO:0055023	feature_id[481].value <= threshold=1.2396484017372131
node_287: feature_name=GO:0030896	feature_id[857].value <= threshold=0.5054407715797424
node_288: feature_name=GO:0019826	feature_id[238].value <= threshold=0.6727499663829803
node_289: feature_name=GO:0003140	feature_id[30].value <= threshold=1.0574628114700317
node_290: feature_name=GO:0051595	feature_id[771].value <= threshold=0.5871960520744324
node_291: feature_name=GO:0015811	feature_id[96].value > threshold=0.5829855799674988
Class: Other lncRNAs
Rules_100	passed counts:3
node_0: feature_name=GO:0006275	feature_id[261].value <= threshold=0.611920565366745
node_1: feature_name=GO:0090162	feature_id[0].value > threshold=4.428043030202389e-05
node_253: feature_name=GO:0071617	feature_id[203].value <= threshold=0.542830616235733
node_254: feature_name=GO:0048934	feature_id[86].value <= threshold=0.6984235048294067
node_255: feature_name=GO:0031492	feature_id[671].value <= threshold=0.22999948263168335
node_256: feature_name=GO:2000052	feature_id[602].value <= threshold=1.058824062347412
node_257: feature_name=GO:0001697	feature_id[173].value <= threshold=1.4856967329978943
node_258: feature_name=GO:2000323	feature_id[91].value <= threshold=0.3833317458629608
node_259: feature_name=GO:0051861	feature_id[280].value <= threshold=0.814757764339447
node_260: feature_name=GO:0090344	feature_id[832].value <= threshold=0.28676562011241913
node_261: feature_name=GO:0003690	feature_id[479].value > threshold=0.00011137216642964631
node_267: feature_name=GO:0016895	feature_id[897].value <= threshold=0.48792417347431183
node_268: feature_name=GO:0050901	feature_id[175].value <= threshold=1.6129865050315857
node_269: feature_name=GO:0021903	feature_id[211].value <= threshold=0.9824570417404175
node_270: feature_name=GO:0051534	feature_id[945].value <= threshold=0.5949008762836456
node_271: feature_name=GO:1900006	feature_id[697].value <= threshold=0.3523732125759125
node_272: feature_name=GO:0016755	feature_id[874].value <= threshold=0.9256992340087891
node_273: feature_name=GO:0031308	feature_id[875].value <= threshold=1.1520193219184875
node_274: feature_name=GO:0006971	feature_id[358].value <= threshold=1.1031953692436218
node_275: feature_name=GO:0008589	feature_id[722].value <= threshold=3.153539538383484
node_276: feature_name=GO:0016406	feature_id[70].value <= threshold=1.0396768450737
node_277: feature_name=GO:0045263	feature_id[339].value <= threshold=5.477336168289185
node_278: feature_name=GO:0090162	feature_id[0].value <= threshold=1.5517151951789856
node_279: feature_name=GO:0010760	feature_id[718].value <= threshold=1.2278234958648682
node_280: feature_name=GO:0035315	feature_id[670].value <= threshold=2.1861218214035034
node_281: feature_name=GO:0048484	feature_id[136].value <= threshold=0.9969654381275177
node_282: feature_name=GO:0002832	feature_id[379].value <= threshold=1.9397146105766296
node_283: feature_name=GO:0030202	feature_id[643].value <= threshold=1.0854225754737854
node_284: feature_name=GO:0048066	feature_id[148].value <= threshold=0.7586824595928192
node_285: feature_name=GO:0043951	feature_id[64].value <= threshold=0.9003156423568726
node_286: feature_name=GO:0055023	feature_id[481].value <= threshold=1.2396484017372131
node_287: feature_name=GO:0030896	feature_id[857].value <= threshold=0.5054407715797424
node_288: feature_name=GO:0019826	feature_id[238].value <= threshold=0.6727499663829803
node_289: feature_name=GO:0003140	feature_id[30].value <= threshold=1.0574628114700317
node_290: feature_name=GO:0051595	feature_id[771].value <= threshold=0.5871960520744324
node_291: feature_name=GO:0015811	feature_id[96].value <= threshold=0.5829855799674988
node_292: feature_name=GO:0050916	feature_id[838].value > threshold=1.2811386585235596
Class: Other lncRNAs
Rules_101	passed counts:3
node_0: feature_name=GO:0006275	feature_id[261].value <= threshold=0.611920565366745
node_1: feature_name=GO:0090162	feature_id[0].value > threshold=4.428043030202389e-05
node_253: feature_name=GO:0071617	feature_id[203].value <= threshold=0.542830616235733
node_254: feature_name=GO:0048934	feature_id[86].value <= threshold=0.6984235048294067
node_255: feature_name=GO:0031492	feature_id[671].value <= threshold=0.22999948263168335
node_256: feature_name=GO:2000052	feature_id[602].value <= threshold=1.058824062347412
node_257: feature_name=GO:0001697	feature_id[173].value <= threshold=1.4856967329978943
node_258: feature_name=GO:2000323	feature_id[91].value <= threshold=0.3833317458629608
node_259: feature_name=GO:0051861	feature_id[280].value <= threshold=0.814757764339447
node_260: feature_name=GO:0090344	feature_id[832].value <= threshold=0.28676562011241913
node_261: feature_name=GO:0003690	feature_id[479].value > threshold=0.00011137216642964631
node_267: feature_name=GO:0016895	feature_id[897].value <= threshold=0.48792417347431183
node_268: feature_name=GO:0050901	feature_id[175].value <= threshold=1.6129865050315857
node_269: feature_name=GO:0021903	feature_id[211].value <= threshold=0.9824570417404175
node_270: feature_name=GO:0051534	feature_id[945].value <= threshold=0.5949008762836456
node_271: feature_name=GO:1900006	feature_id[697].value <= threshold=0.3523732125759125
node_272: feature_name=GO:0016755	feature_id[874].value <= threshold=0.9256992340087891
node_273: feature_name=GO:0031308	feature_id[875].value <= threshold=1.1520193219184875
node_274: feature_name=GO:0006971	feature_id[358].value <= threshold=1.1031953692436218
node_275: feature_name=GO:0008589	feature_id[722].value <= threshold=3.153539538383484
node_276: feature_name=GO:0016406	feature_id[70].value <= threshold=1.0396768450737
node_277: feature_name=GO:0045263	feature_id[339].value <= threshold=5.477336168289185
node_278: feature_name=GO:0090162	feature_id[0].value <= threshold=1.5517151951789856
node_279: feature_name=GO:0010760	feature_id[718].value <= threshold=1.2278234958648682
node_280: feature_name=GO:0035315	feature_id[670].value <= threshold=2.1861218214035034
node_281: feature_name=GO:0048484	feature_id[136].value <= threshold=0.9969654381275177
[truncated: 3,853 more rows]
